# Supplementary material for: Challenges for Plant Growth Promoting Microorganism Transfer from Science to Industry: A Case Study from Chile
Source: Microorganisms. 2023 Apr 19;11(4):1061. doi: 10.3390/microorganisms11041061 (PMC10140820; doi:10.3390/microorganisms11041061)
Supplement: Supplementary file 1 [file microorganisms-11-01061-s001.zip › SM2_metadata.xlsx]

## Sheet: Final
													Type of PGP mechanism									Type of environmental stress											Type of inoculated plant
nº	Authors	Title	Year	Doi	Source	Chile Region	Zona	Study approach	MO origin	MO type isolated/characterized/inoculated/studied	Plant type sampled/inoculated/studied	Research objective	Phosphate solubilization	Atmospheric nitrogen fixation	Siderophores production	Phytohormones production	ACC-deaminase	Biocontrol of phytopatogens	Exopolysaccharides production	Others	Not applicable	Stress	pH	Nutrient deficit	Salinity	Drought	Pollution	Temperature	UV radiation	Altitude	Fire	Others	vegetables	Fruit trees	Grasslands	Ornamental	Forestry	Phytoremedial	Without commercial interest	Natives	Others	TRL	Inoculation type	Strain identity
1	Santander C., García S., Moreira J., Aponte H., Araneda P., Olave J., Vidal G., Cornejo P.	Arbuscular mycorrhizal fungal abundance in elevation belts of the hyperarid Atacama Desert	2021	10.1016/j.funeco.2021.101060	algorithm	Tarapacá	Zone I	Independent culture	Native	Fungi	Native	Characterization of communities (CC)	0	0	0	0	0	0	0	1	0	0	0	0	0	0	0	0	0	0	0	0	0	0	0	0	0	0	0	0	0	TRL1	Not applicable	N/A
2	Satjarak A., Graham L.E., Piotrowski M.J., Trest M.T., Wilcox L.W., Cook M.E., Knack J.J., Arancibia-Avila P.	Shotgun metagenomics and microscopy indicate diverse cyanophytes, other bacteria, and microeukaryotes in the epimicrobiota of a northern Chilean wetland Nostoc (Cyanobacteria)	2021	10.1111/jpy.13084	algorithm	Arica y Parinacota	Zone I	Independent culture	Native	Bacteria+Fungi+Archeae	Native	Functional characterization of comunnities (FCC)	0	0	0	0	0	0	0	0	1	0	0	0	0	0	0	0	0	0	0	0	0	0	0	0	0	0	0	0	0	TRL1	Not applicable	N/A
3	Rodríguez-Echeverría S., Delgado-Baquerizo M., Morillo J.A., Gaxiola A., Manzano M., Marquet P.A., González L., Cavieres L.A., Pugnaire F.I., Armas C.	Azorella Cushion Plants and Aridity are Important Drivers of Soil Microbial Communities in Andean Ecosystems	2021	10.1007/s10021-021-00603-1	algorithm	Arica y Parinacota	Zone I	Independent culture	Native	Bacteria+Archeae	Native	Characterization of communities (CC)	0	0	0	0	0	0	0	0	1	3	0	0	0	1	0	1	1	0	0	0	0	0	0	0	0	0	0	0	0	TRL1	Not applicable	N/A
4	Santander C., Aroca R., Cartes P., Vidal G., Cornejo P.	Aquaporins and cation transporters are differentially regulated by two arbuscular mycorrhizal fungi strains in lettuce cultivars growing under salinity conditions	2021	10.1016/j.plaphy.2020.11.025	algorithm	Tarapacá	Zone I	Dependent culture	Native	Fungi	Commercial	Evaluation of growth promoting effect in plant (EEP)	0	0	0	0	0	0	0	0	1	1	0	0	1	0	0	0	0	0	0	0	1	0	0	0	0	0	0	0	0	TRL2	Single strain	Claroideoglomus lamellosum; Funneliformis mosseae
5	Maldonado S., Rodríguez A., Ávila B., Morales P., González M.P., Araya Angel J.P.A., Olalde V., Bravo J., Jana C., Sierra C., Stoll A.	Enhanced Crop Productivity and Sustainability by Using Native Phosphate Solubilizing Rhizobacteria in the Agriculture of Arid Zones	2020	10.3389/fsufs.2020.607355	algorithm	Coquimbo	Zone II	Dependent culture	Native	Bacteria	Native	Evaluation of growth promoting effect in plant (EEP)	1	1	1	1	1	1	0	0	0	0	0	0	0	0	0	0	0	0	0	0	1	0	0	0	0	0	0	0	0	TRL4	Single strain	Erwinia sp.
6	Sepúlveda Chavera G.F., Macuer M.A., Torres P.M.	Endospore-forming bacteria present in a commercial stabilized poultry manure determines the fusarium biocontrol and the tomato growth promotion	2020	10.3390/agronomy10111636	algorithm	Arica y Parinacota	Zone I	Dependent culture	No native	Bacteria	Commercial	EEP+CC	0	0	0	0	0	1	0	0	0	0	0	0	0	0	0	0	0	0	0	0	1	0	0	0	0	0	0	0	0	TRL2	Not applicable	N/A
7	Vidal A., Parada R., Mendoza L., Cotoras M.	Endophytic fungi isolated from plants growing in central andean precordillera of chile with antifungal activity against botrytis cinerea	2020	10.3390/jof6030149	algorithm	Bío-Bío	Zone IV	Dependent culture	Native	Fungi	Native	CC+CFC	0	0	0	0	0	1	0	0	0	0	0	0	0	0	0	0	0	0	0	0	0	0	0	0	0	0	0	0	0	TRL1	Not applicable	N/A
8	Gaete A., Mandakovic D., González M.	Isolation and identification of soil bacteria from extreme environments of Chile and their plant beneficial characteristics	2020	10.3390/microorganisms8081213	algorithm	Antofagasta	Zone I	Dependent culture	Native	Bacteria	Native	Characterization of mechanisms PGP (CM)	1	1	1	1	1	0	0	0	0	2	0	0	0	1	0	1	0	0	0	0	0	0	0	0	0	0	0	0	0	TRL2	Not applicable	Pseudomonas; Stenotrophomonas (DD1), Halomonas (N5), Arthrobacter (AF3), Microbacterium (M1-B and M2-A), Rhodococcus (D4), Streptomyces (M1-A), Paenibacillus (5B and AF2), Oceanobacillus (E4), Alkalihalobacillus (E3-18 and E4-18), Bacillus (DD9, M2-B and TS1-1), Peribacillus (B1), and Mesobacillus (7C, 5D, 1C and 5C)
9	Alarcón J., Márquez S., Teunisse G., Mendoza C., Meneses C., Baldini A., Parra P., Zamora P., Boehmwald F., Castro-Nallar E.	Sequences of Endophytic Fungal and Bacterial Communities from Araucaria araucana [(Molina) K. Koch, 1869] in the Coastal and Andes Mountain Ranges, Chile	2020	10.1128/MRA.00544-20	algorithm	Bío-Bío	Zone IV	Independent culture	Native	Bacteria+Fungi	Native	Characterization of communities (CC)	0	0	0	0	0	0	0	0	1	0	0	0	0	0	0	0	0	0	0	0	0	0	0	0	0	0	0	0	0	TRL1	Not applicable	N/A
10	Castro Tapia M.P., Madariaga Burrows R.P., Ruiz Sepúlveda B., Vargas Concha M., Vera Palma C., Moya-Elizondo E.A.	Antagonistic Activity of Chilean Strains of Pseudomonas protegens Against Fungi Causing Crown and Root Rot of Wheat (Triticum aestivum L.)	2020	10.3389/fpls.2020.00951	algorithm	Ñuble	Zone IV	Dependent culture	Native	Bacteria	Native	Evaluation of growth promoting effect in plant (EEP)	0	0	0	0	0	1	0	0	0	0	0	0	0	0	0	0	0	0	0	0	0	0	1	0	0	0	0	0	0	TRL2	Consortia	P. protegens
11	Herrera H., Novotná A., Ortiz J., Soto J., Arriagada C.	Isolation and identification of plant growth-promoting bacteria from rhizomes of Arachnitis uniflora, a fully mycoheterotrophic plant in southern Chile	2020	10.1016/j.apsoil.2020.103512	algorithm	Araucanía	Zone IV	Dependent culture	Native	Bacteria	Native	CM+EEP	0	0	1	0	0	0	0	1	0	0	0	0	0	0	0	0	0	0	0	0	0	0	0	0	0	0	0	0	0	TRL1	Not applicable	Bacillus megaterium
12	González-Teuber M., Vilo C., Guevara-Araya M.J., Salgado-Luarte C., Gianoli E.	Leaf resistance traits influence endophytic fungi colonization and community composition in a South American temperate rainforest	2020	10.1111/1365-2745.13314	algorithm	Ríos	Zone V	Independent culture	Native	Fungi	Native	Characterization of communities (CC)	0	0	0	0	0	0	0	0	1	0	0	0	0	0	0	0	0	0	0	0	0	0	0	0	0	0	0	0	0	TRL1	Not applicable	N/A
13	Aballay E., Prodan S., Correa P., Allende J.	Assessment of rhizobacterial consortia to manage plant parasitic nematodes of grapevine	2020	10.1016/j.cropro.2020.105103	algorithm	Metropolitana	Zone III	Dependent culture	Native	Bacteria	Commercial	CM+EEP	0	0	0	0	0	1	0	0	0	0	0	0	0	0	0	0	0	0	0	0	0	1	0	0	0	0	0	0	0	TRL3	Single strain	Bacillus amyloliquefaciens FR203A
14	Astorga-Eló M., Zhang Q., Larama G., Stoll A., Sadowsky M.J., Jorquera M.A.	Composition, Predicted Functions and Co-occurrence Networks of Rhizobacterial Communities Impacting Flowering Desert Events in the Atacama Desert, Chile	2020	10.3389/fmicb.2020.00571	algorithm	Atacama	Zone II	Independent culture	Native	Bacteria	Native	Characterization of communities (CC)	0	0	0	0	0	0	0	0	1	0	0	0	0	0	0	0	0	0	0	0	0	0	0	0	0	0	0	0	0	TRL1	Not applicable
15	Claro A., Mujica M.I., Cisternas M., Armesto J.J., Pérez F.	Low mycorrhizal diversity in the endangered and rare orchids Bipinnula volckmannii and B. apinnula of Central Chile	2019	10.1007/s13199-019-00648-w	algorithm	Maule	Zone III	Dependent culture	Native	Fungi	Native	EEP+CC	0	0	0	0	0	0	0	0	1	0	0	0	0	0	0	0	0	0	0	0	0	0	0	0	0	0	0	1	0	TRL1	Single strain	Ceratobasidiaceae sp; Stemphylium sp., Hormonema viticola,Morchellasp. and Ilionectria panacis
16	Herrera H., Sanhueza T., Novotná A., Charles T.C., Arriagada C.	Isolation and identification of endophytic bacteria from mycorrhizal tissues of terrestrial orchids from Southern Chile	2020	10.3390/d12020055	algorithm	Araucanía	Zone IV	Dependent culture	Native	Fungi	Both	EEP+CC	1	0	1	0	0	1	0	0	0	0	0	0	0	0	0	0	0	0	0	0	0	0	0	0	0	0	0	0	0	TRL1	Not applicable	C. barbata (strains CM01, CB01, CC03, GA01, GA03, and CM03);
17	Pereira G., Herrera H., Arriagada C., Cid H., García J.L., Atala C.	Controlled mycorrhization of the endemic Chilean orchid Chloraea gavilu (Orchidaceae)	2020	10.1080/11263504.2020.1801875	algorithm	Bío-Bío	Zone IV	Dependent culture	Native	Fungi	Native	Evaluation of growth promoting effect in plant (EEP)	0	0	0	0	0	0	0	1	0	0	0	0	0	0	0	0	0	0	0	0	0	0	0	1	0	0	0	1	0	TRL1	Single strain	Ceratobasidium
18	Knief C., Bol R., Amelung W., Kusch S., Frindte K., Eckmeier E., Jaeschke A., Dunai T., Fuentes B., Mörchen R., Schütte T., Lücke A., Klumpp E., Kaiser K., Rethemeyer J.	Tracing elevational changes in microbial life and organic carbon sources in soils of the Atacama Desert	2020	10.1016/j.gloplacha.2019.103078	algorithm	Tarapacá	Zone I	Independent culture	Native	Bacteria+Fungi	Native	CM+CFC	0	0	0	0	0	0	0	0	1	0	0	0	0	0	0	0	0	0	0	0	0	0	0	0	0	0	0	0	0	TRL1	Not applicable	N/A
19	Zhang Q., Acuña J.J., Inostroza N.G., Mora M.L., Radic S., Sadowsky M.J., Jorquera M.A.	Endophytic Bacterial Communities Associated with Roots and Leaves of Plants Growing in Chilean Extreme Environments	2019	10.1038/s41598-019-41160-x	algorithm	Antofagasta	Zone I	Independent culture	Native	Bacteria	Native	Characterization of communities (CC)	0	0	0	0	0	0	0	0	1	0	0	0	0	0	0	0	0	0	0	0	0	0	0	0	0	0	0	0	0	TRL1	Not applicable	N/A
20	Fernández-Gómez B., Maldonado J., Mandakovic D., Gaete A., Gutiérrez R.A., Maass A., Cambiazo V., González M.	Bacterial communities associated to Chilean altiplanic native plants from the Andean grasslands soils	2019	10.1038/s41598-018-37776-0	algorithm	Antofagasta	Zone I	Independent culture	Native	Bacteria+Fungi	Native	Characterization of communities (CC)	0	0	0	0	0	0	0	0	1	0	0	0	0	0	0	0	0	0	0	0	0	0	0	0	0	0	0	0	0	TRL1	Not applicable	N/A
21	Herrera H., Soto J., de Bashan L.E., Sampedro I., Arriagada C.	Root-associated fungal communities in two populations of the fully mycoheterotrophic plant arachnitis uniflora phil. (corsiaceae) in southern Chile	2019	10.3390/microorganisms7120586	algorithm	Araucanía	Zone IV	Dependent culture	Native	Fungi	Native	CC+CFC	1	0	1	1	0	0	0	1	0	0	0	0	0	0	0	0	0	0	0	0	0	0	0	0	0	0	0	0	0	TRL1	Not applicable	N/A
22	Soto J., Ortiz J., Herrera H., Fuentes A., Almonacid L., Charles T.C., Arriagada C.	Enhanced arsenic tolerance in Triticum aestivum inoculated with arsenic-resistant and plant growth promoter microorganisms from a heavy metal-polluted soil	2019	10.3390/microorganisms7090348	algorithm	Valparaíso	Zone III	Dependent culture	Native	Bacteria+Fungi	Native	Characterization of mechanisms PGP (CM)	0	0	0	0	0	0	0	1	0	1	0	0	0	0	0	0	0	0	0	1	0	0	1	0	0	0	0	0	0	TRL2	Single strain	Pseudomonas gessardii; Brevundimonas intermedia; Fimetariella rabenhortii; Hormonema viticola
23	Benavent-González A., Raggio J., Villagra J., Blanquer J.M., Pintado A., Rozzi R., Green T.G.A., Sancho L.G.	High nitrogen contribution by Gunnera magellanica and nitrogen transfer by mycorrhizas drive an extraordinarily fast primary succession in sub-Antarctic Chile	2019	10.1111/nph.15838	algorithm	Magallanes y la Antártica Chilena	Zone VI	Independent culture	Native	Fungi	Native	Functional characterization of comunnities (FCC)	0	1	0	0	0	0	0	0	0	0	0	0	0	0	0	0	0	0	0	0	0	0	0	0	0	0	0	0	0	TRL1	Not applicable	N/A
24	Vera Palma C.A., Madariaga Burrows R.P., González M.G., Sepúlveda B.R., Moya-Elizondo E.A.	Integration between Pseudomonas protegens strains and fluquinconazole for the control of take-all in wheat	2019	10.1016/j.cropro.2019.03.020	algorithm	Ñuble	Zone IV	Dependent culture	Native	Bacteria	Commercial	Evaluation of growth promoting effect in plant (EEP)	0	0	0	0	0	1	0	0	0	0	0	0	0	0	0	0	0	0	0	0	0	0	1	0	0	0	0	0	0	TRL2	Consortia	Pseudomonas protegens ChB7 strain
25	Truong C., Gabbarini L.A., Corrales A., Mujic A.B., Escobar J.M., Moretto A., Smith M.E.	Ectomycorrhizal fungi and soil enzymes exhibit contrasting patterns along elevation gradients in southern Patagonia	2019	10.1111/nph.15714	algorithm	Magallanes y la Antártica Chilena	Zone VI	Independent culture	Native	Fungi	Native	CM+CFC	0	0	0	0	0	0	0	0	1	0	0	0	0	0	0	0	0	0	0	0	0	0	0	0	0	0	0	0	0	TRL1	Not applicable	N/A
26	Silva-Flores P., Bueno C.G., Neira J., Palfner G.	Factors Affecting Arbuscular Mycorrhizal Fungi Spore Density in the Chilean Mediterranean-Type Ecosystem	2019	10.1007/s42729-018-0004-6	algorithm	Araucanía	Zone IV	Dependent culture	Native	Fungi	Native	CM+CFC	0	0	0	0	0	0	0	0	1	0	0	0	0	0	0	0	0	0	0	0	0	0	0	0	0	0	0	0	0	TRL1	Not applicable	N/A
27	Miura T., Sánchez R., Castañeda L.E., Godoy K., Barbosa O.	Shared and unique features of bacterial communities in native forest and vineyard phyllosphere	2019	10.1002/ece3.4949	algorithm	Libertador General Bernardo O´Higgins	Zone III	Independent culture	Native	Bacteria	Commercial	Characterization of communities (CC)	0	0	0	0	0	0	0	0	1	0	0	0	0	0	0	0	0	0	0	0	0	0	0	0	0	0	0	0	0	TRL1	Not applicable	N/A
28	López D., Sepúlveda-Mardones M., Ruiz-Tagle N., Sossa K., Uggetti E., Vidal G.	Potential methane production and molecular characterization of bacterial and archaeal communities in a horizontal subsurface flow constructed wetland under cold and warm seasons	2019	10.1016/j.scitotenv.2018.08.186	algorithm	Bío-Bío	Zone IV	Independent culture	Native	Bacteria+Fungi+Archeae	Commercial	CM+CFC	0	0	0	0	0	0	0	0	1	0	0	0	0	0	0	0	0	0	0	0	0	0	0	0	0	0	0	0	0	TRL4	Not applicable	N/A
29	Durán P., Viscardi S., Acuña J.J., Cornejo P., Azcón R., de la Luz Mora M.	Endophytic selenobacteria and arbuscular mycorrhizal fungus for selenium biofortification and Gaeumannomyces graminis biocontrol	2018	10.4067/S0718-95162018005002902	algorithm	Araucanía	Zone IV	Dependent culture	Native	Bacteria+Fungi	Native	CM+EEP	0	0	0	0	0	0	0	1	0	0	0	0	0	0	0	0	0	0	0	0	0	0	0	0	0	0	0	0	1	TRL2	Consortia	Acinetobacter sp.E6.2
30	Rilling J.I., Acuña J.J., Sadowsky M.J., Jorquera M.A.	Putative nitrogen-fixing bacteria associated with the rhizosphere and root endosphere of wheat plants grown in an andisol from southern Chile	2018	10.3389/fmicb.2018.02710	algorithm	Araucanía	Zone IV	Both	Native	Bacteria	Commercial	CM+CC	0	1	0	0	0	0	0	0	0	0	0	0	0	0	0	0	0	0	0	0	0	0	0	0	0	0	0	0	0	TRL1	Not applicable
31	Castañeda L.E., Miura T., Sánchez R., Barbosa O.	Effects of agricultural management on phyllosphere fungal diversity in vineyards and the association with adjacent native forests	2018	10.7717/PEERJ.5715	algorithm	Libertador General Bernardo O´Higgins	Zone III	Independent culture	Native	Bacteria	Native	Characterization of communities (CC)	0	0	0	0	0	0	0	0	1	0	0	0	0	0	0	0	0	0	0	0	0	0	0	0	0	0	0	0	0	TRL1	Not applicable	N/A
32	González-Teuber M., Urzúa A., Morales A., Ibáñez C., Bascuñán-Godoy L.	Benefits of a root fungal endophyte on physiological processes and growth of the vulnerable legume tree Prosopis chilensis (Fabaceae)	2018	10.1093/jpe/rty019	algorithm	Coquimbo	Zone II	Dependent culture	Native	Fungi	Native	CM+EEP	0	0	0	0	0	0	0	0	1	0	0	0	0	0	0	0	0	0	0	0	0	0	0	0	0	0	1	1	0	TRL2	Single strain	Penicillium sp.
33	Fuentes-Ramirez A., Barrientos M., Almonacid L., Arriagada-Escamilla C., Salas-Eljatib C.	Short-term response of soil microorganisms, nutrients and plant recovery in fire-affected Araucaria araucana forests	2018	10.1016/j.apsoil.2018.08.010	algorithm	Araucanía	Zone IV	Independent culture	Native	Bacteria+Fungi	Native	Characterization of communities (CC)	0	0	0	0	0	0	0	0	1	1	0	0	0	0	0	0	0	0	1	0	0	0	0	0	0	0	0	0	0	TRL1	Not applicable	N/A
34	ThomasStowhasaJoséVerdejoaCarolinaYáñezbJuan L.Celis-DiezaCarmen EnidMartínezcAlexanderNeamana	Zinc alleviates copper toxicity to symbiotic nitrogen fixation in agricultural soil affected by copper mining in central Chile	2018	10.1016/j.chemosphere.2018.06.166	algorithm	Valparaíso	Zone III	Dependent culture	Native	Bacteria+Fungi+Archeae	Commercial	Functional characterization of comunnities (FCC)	0	1	0	0	0	0	0	0	0	1	0	0	0	0	0	0	0	0	0	1	0	0	1	0	0	0	0	0	0	TRL2	Single strain	Rhizobium etli CFN 42
35	Herrera H., Valadares R., Oliveira G., Fuentes A., Almonacid L., do Nascimento S.V., Bashan Y., Arriagada C.	Adaptation and tolerance mechanisms developed by mycorrhizal Bipinnula fimbriata plantlets (Orchidaceae) in a heavy metal-polluted ecosystem	2018	10.1007/s00572-018-0858-4	algorithm	Valparaíso	Zone III	Independent culture	Native	Fungi	Native	CM+EEP	0	0	0	0	0	0	0	0	1	1	0	0	0	0	1	0	0	0	0	0	0	0	0	0	0	0	1	1	0	TRL1	Not applicable	EU218888 (Tulasnella calospora)
36	Cedeño-García G.A., Gerding M., Moraga G., Inostroza L., Fischer S., Sepúlveda-Caamaño M., Oyarzúa P.	Plant growth promoting rhizobacteria with ACC deaminase activity isolated from Mediterranean dryland areas in Chile: Effects on early nodulation in alfalfa	2018	10.4067/S0718-58392018000300360	algorithm	Maule	Zone III	Dependent culture	Native	Bacteria	Commercial	CM+EEP	1	0	0	1	1	0	0	0	0	0	0	0	0	0	0	0	0	0	0	0	0	0	1	0	0	0	0	0	0	TRL3	Single strain	Pseudomonas fluorescens
37	Pereira G., Suz L.M., Albornoz V., Romero C., García L., Leiva V., Atala C.	Mycorrhizal fungi associated with Codonorchis lessonii (Brongn.) lindl., a terrestrial orchid from Chile [Hongos micorrícicos asociados a Codonorchis lessonii (Brongn.) lindl., una orquídea terrestre de Chile]	2018	10.4067/S0717-66432018000100447	algorithm	Bío-Bío	Zone IV	Independent culture	Native	Fungi	Both	Characterization of communities (CC)	0	0	0	0	0	0	0	0	1	0	0	0	0	0	0	0	0	0	0	0	0	0	0	0	0	0	0	0	0	TRL1	Not applicable	N/A
38	Lam E.J., Gálvez M.E., Cánovas M., Montofré Í.L., Keith B.F.	Assessment of the adaptive capacity of plant species in copper mine tailings in arid and semiarid environments	2018	10.1007/s11368-017-1835-9	algorithm	Antofagasta	Zone I	Independent culture	Native	Fungi	Native	Evaluation of growth promoting effect in plant (EEP)	0	0	0	0	0	0	0	0	1	1	0	0	0	0	1	0	0	0	0	0	0	0	0	0	0	0	0	0	0	TRL1	Not applicable	N/A
39	Benedetti S., Balocchi F., Hormazábal M.	Arbuscular mycorrhizal fungi (AMF) linked to peumus boldus natural formation in central Chile [Hongos micorrícicos arbusculares (HMA) asociados a poblaciones naturales de peumus boldus en Chile central]	2018	10.4067/S0717-66432018000100431	algorithm	Libertador General Bernardo O´Higgins	Zone III	Independent culture	Native	Fungi	Native	Characterization of communities (CC)	0	0	0	0	0	0	0	0	1	0	0	0	0	0	0	0	0	0	0	0	0	0	0	0	0	0	0	0	0	TRL1	Not applicable	N/A
40	González-Teuber M., Urzúa A., Plaza P., Bascuñán-Godoy L.	Effects of root endophytic fungi on response of Chenopodium quinoa to drought stress	2018	10.1007/s11258-017-0791-1	algorithm	Antofagasta	Zone I	Dependent culture	Native	Fungi	Native	Evaluation of growth promoting effect in plant (EEP)	0	0	0	0	0	0	0	0	1	1	0	0	0	1	0	0	0	0	0	0	0	0	1	0	0	0	0	1	0	TRL2	Single strain	P. minioluteum
41	Aguilera P., Larsen J., Borie F., Berríos D., Tapia C., Cornejo P.	New evidences on the contribution of arbuscular mycorrhizal fungi inducing Al tolerance in wheat	2018	10.1016/j.rhisph.2017.11.002	algorithm	Lagos	Zone V	Independent culture	Native	Fungi	Commercial	Characterization of communities (CC)	1	0	0	0	0	0	0	0	0	0	0	0	0	0	0	0	0	0	0	0	0	0	1	0	0	0	0	0	0	TRL1	Not applicable	AMF
42	Martínez O.A., Encina C., Tomckowiack C., Droppelmann F., Jara R., Maldonado C., Muñoz O., García-Fraile P., Rivas R.	Serratia strains isolated from the rhizosphere of raulí (Nothofagus alpina) in volcanic soils harbour pgpr mechanisms and promote raulí plantlet growth	2018	10.4067/S0718-95162018005002302	algorithm	Ríos	Zone V	Dependent culture	Native	Bacteria	Commercial	CM+EEP	0	1	0	1	1	0	0	0	0	0	0	0	0	0	0	0	0	0	0	0	0	0	0	0	0	0	0	0	0	TRL1	Single strain	Serratia liquefaciens
43	Zepeda-Paulo F., Ortiz-Martínez S., Silva A.X., Lavandero B.	Low bacterial community diversity in two introduced aphid pests revealed with 16S rRNA amplicon sequencing	2018	10.7717/peerj.4725	algorithm	Ríos	Zone V	Independent culture	Native	Bacteria	Commercial	Characterization of communities (CC)	0	0	0	0	0	0	0	0	1	0	0	0	0	0	0	0	0	0	0	0	0	0	0	0	0	0	0	0	0	TRL1	Not applicable	Pseudomonas palleroniana
44	Fernández-Martínez M.A., Pérez-Ortega S., Pointing S.B., Allan Green T.G., Pintado A., Rozzi R., Sancho L.G., de los Ríos A.	Microbial succession dynamics along glacier forefield chronosequences in Tierra del Fuego (Chile)	2017	10.1007/s00300-017-2110-7	algorithm	Magallanes y la Antártica Chilena	Zone VI	Independent culture	Native	Bacteria+Fungi	Native	CC+CFC	0	0	0	0	0	0	0	0	1	0	0	0	0	0	0	0	0	0	0	0	0	0	0	0	0	0	0	0	0	TRL1	Not applicable	N/A
45	Graham L.E., Graham J.M., Knack J.J., Trest M.T., Piotrowski M.J., Arancibia-Avila P.	A Sub-Antarctic peat moss metagenome indicates microbiome resilience to stress and biogeochemical functions of early paleozoic terrestrial ecosystems	2017	10.1086/693019	algorithm	Magallanes y la Antártica Chilena	Zone VI	Independent culture	Native	Bacteria+Fungi	Native	CC+CFC	0	0	0	0	0	0	0	0	1	0	0	0	0	0	0	0	0	0	0	0	0	0	0	0	0	0	0	0	0	TRL1	Not applicable	N/A
46	Castillo C., Montoya Á., Borie F.	Effect of host or non-host previous-crop in growth and mycorrhizal propagule in wheat in Chilean Andisol and Inceptisol soils [Efecto de pre-cultivos hospederos y no hospederos en el crecimiento y propágulos micorricicos de trigo en Andisol e Inceptisol de Chile]	2017	10.4067/S0719-38902017005000703.	algorithm	Araucanía	Zone IV	Independent culture	Native	Fungi	Commercial	Characterization of communities (CC)	0	0	0	0	0	0	0	0	1	0	0	0	0	0	0	0	0	0	0	0	0	0	1	0	0	0	0	0	0	TRL1	Not applicable	N/A
47	Durán P., Jorquera M., Viscardi S., Carrion V.J., Mora M.L., Pozo M.J.	Screening and characterization of potentially suppressive soils against Gaeumannomyces graminis under extensive wheat cropping by Chilean indigenous communities	2017	10.3389/fmicb.2017.01552	algorithm	Araucanía	Zone IV	Both	Native	Bacteria	Native	CM+CFC	0	0	0	0	0	0	0	0	1	0	0	0	0	0	0	0	0	0	0	0	0	0	0	0	0	0	0	0	0	TRL1	Not applicable	N/A
48	Aguilera P., Marín C., Oehl F., Godoy R., Borie F., Cornejo P.	Selection of aluminum tolerant cereal genotypes strongly influences the arbuscular mycorrhizal fungal communities in an acidic Andosol	2017	10.1016/j.agee.2017.05.031	algorithm	Araucanía	Zone IV	Independent culture	Native	Fungi	Commercial	Functional characterization of comunnities (FCC)	0	0	0	0	0	0	0	0	1	1	0	0	0	0	0	0	0	0	0	1	0	0	0	0	0	0	0	0	0	TRL2	Not applicable	Acaulospora laevis Gerd. & Trappe
49	Mora M.D.L.L., Demanet R., Acuña J.J., Viscardi S., Jorquera M., Rengel Z., Durán P.	Aluminum-tolerant bacteria improve the plant growth and phosphorus content in ryegrass grown in a volcanic soil amended with cattle dung manure	2017	10.1016/j.apsoil.2017.03.013	algorithm	Araucanía	Zone IV	Dependent culture	Native	Bacteria	Commercial	CM+EEP+CC	0	0	1	1	0	0	0	0	0	0	0	0	0	0	0	0	0	0	0	0	0	0	1	0	0	0	0	0	0	TRL2	Single strain	Klebsiella sp. RC3
50	Renny M., Acosta M.C., Cofré N., Domínguez L.S., Bidartondo M.I., Sérsic A.N.	Genetic diversity patterns of arbuscular mycorrhizal fungi associated with the mycoheterotroph Arachnitis uniflora Phil. (Corsiaceae)	2017	10.1093/aob/mcx023	algorithm	Bío-Bío	Zone IV	Independent culture	Native	Bacteria	Native	Characterization of communities (CC)	0	0	0	0	0	0	0	0	1	0	0	0	0	0	0	0	0	0	0	0	0	0	0	0	0	0	0	0	0	TRL1	Not applicable	N/A
51	Gerding M., Oyarzúa P., García L., Fischer S., Norambuena C., Barahona V., del Pozo A., Ovalle C.	Diversity and symbiotic effectiveness of Adesmia spp. root nodule bacteria in central and southern Chile	2017	10.1007/s13199-016-0440-9	algorithm	Bío-Bío	Zone IV	Independent culture	Native	Bacteria	Native	Characterization of communities (CC)	0	0	0	0	0	0	0	0	1	0	0	0	0	0	0	0	0	0	0	0	0	0	0	0	0	0	0	0	0	TRL1	Not applicable	N/A
52	Herrera H., Valadares R., Contreras D., Bashan Y., Arriagada C.	Mycorrhizal compatibility and symbiotic seed germination of orchids from the Coastal Range and Andes in south central Chile	2017	10.1007/s00572-016-0733-0	algorithm	Maule	Zone III	Dependent culture	Native	Fungi	Native	EEP+CC	0	0	0	0	0	0	0	0	1	0	0	0	0	0	0	0	0	0	0	0	0	0	0	1	0	0	0	0	0	TRL2	Single strain	Tulasnella sp
53	González-Teuber M., Vilo C., Bascuñán-Godoy L.	Molecular characterization of endophytic fungi associated with the roots of Chenopodium quinoa inhabiting the Atacama Desert, Chile	2017	10.1016/j.gdata.2016.12.015	algorithm	Antofagasta	Zone I	Dependent culture	Native	Fungi	Commercial	Characterization of communities (CC)	0	0	0	0	0	0	0	0	1	0	0	0	0	0	0	0	0	0	0	0	0	0	0	0	0	0	0	0	0	TRL1	Not applicable	Alternaria alternata
54	Barra P.J., Inostroza N.G., Mora M.L., Crowley D.E., Jorquera M.A.	Bacterial consortia inoculation mitigates the water shortage and salt stress in an avocado (Persea americana Mill.) nursery	2017	10.1016/j.apsoil.2016.11.012	algorithm	Valparaíso	Zone III	Dependent culture	Native	Bacteria	Commercial	CM+EEP	0	0	0	1	1	0	0	0	0	2	0	0	1	1	0	0	0	0	0	0	0	1	0	0	0	0	0	0	0	TRL3	Single strain	Enterobacter sp. 12
55	Seguel A., Cumming J., Cornejo P., Borie F.	Aluminum tolerance of wheat cultivars and relation to arbuscular mycorrhizal colonization in a non-limed and limed Andisol	2016	10.1016/j.apsoil.2016.08.014	algorithm	Araucanía	Zone IV	Independent culture	Native	Fungi	Native	Characterization of communities (CC)	0	0	0	0	0	0	0	0	1	0	0	0	0	0	0	0	0	0	0	0	0	0	0	0	0	0	0	0	0	TRL1	Not applicable	N/A
56	Jorquera M.A., Maruyama F., Ogram A.V., Navarrete O.U., Lagos L.M., Inostroza N.G., Acuña J.J., Rilling J.I., de La Luz Mora M.	Rhizobacterial Community Structures Associated with Native Plants Grown in Chilean Extreme Environments	2016	10.1007/s00248-016-0813-x	algorithm	Araucanía	Zone IV	Independent culture	Native	Bacteria	Native	Characterization of communities (CC)	0	0	0	0	0	0	0	0	1	0	0	0	0	0	0	0	0	0	0	0	0	0	0	0	0	0	0	0	0	TRL1	Not applicable	N/A
57	Lagos L.M., Acuña J.J., Maruyama F., Ogram A., de la Luz Mora M., Jorquera M.A.	Effect of phosphorus addition on total and alkaline phosphomonoesterase-harboring bacterial populations in ryegrass rhizosphere microsites	2016	10.1007/s00374-016-1137-1	algorithm	Ríos	Zone V	Independent culture	Native	Bacteria	Native	CM+CFC	0	0	0	0	0	0	0	0	1	0	0	0	0	0	0	0	0	0	0	0	0	0	0	0	0	0	0	0	0	TRL1	Not applicable	N/A
58	Acuña J.J., Durán P., Lagos L.M., Ogram A., de la Luz Mora M., Jorquera M.A.	Bacterial alkaline phosphomonoesterase in the rhizospheres of plants grown in Chilean extreme environments	2016	10.1007/s00374-016-1113-9	algorithm	Antofagasta	Zone I	Independent culture	Native	Bacteria	Native	Functional characterization of comunnities (FCC)	0	0	0	0	0	0	0	0	1	0	0	0	0	0	0	0	0	0	0	0	0	0	0	0	0	0	0	0	0	TRL1	Not applicable	N/A
59	Aguilera L.E., Armas C., Cea A.P., Gutiérrez J.R., Meserve P.L., Kelt D.A.	Rainfall, microhabitat, and small mammals influence the abundance and distribution of soil microorganisms in a Chilean semi-arid shrubland	2016	10.1016/j.jaridenv.2015.11.013	algorithm	Coquimbo	Zone II	Dependent culture	Native	Bacteria+Fungi	Native	Characterization of communities (CC)	0	0	0	0	0	0	0	0	1	0	0	0	0	0	0	0	0	0	0	0	0	0	0	0	0	0	0	0	0	TRL2	Not applicable	N/A
60	de Armas-Ricard M., Orlando J., Bustamante R., Carú M.	Microbial communities of bulk and eschscholzia californica rhizosphere soils at two altitudes in central chile	2016	10.4067/S0718-95162016005000001	algorithm	Metropolitana	Zone III	Independent culture	Native	Bacteria+Fungi+Archeae	Native	CM+EEP	0	0	0	0	0	0	0	0	1	0	0	0	0	0	0	0	0	0	0	0	0	0	0	0	0	0	0	0	0	TRL1	Not applicable	N/A
61	Seguel A., Castillo C.G., Morales A., Campos P., Cornejo P., Borie F.	Arbuscular mycorrhizal symbiosis in four Al-tolerant wheat genotypes grown in an acidic andisol	2016	10.4067/S0718-95162016005000013	algorithm	Araucanía	Zone IV	Independent culture	Both	Fungi	Native	EEP+CC	0	0	0	0	0	0	0	0	1	0	0	0	0	0	0	0	0	0	0	0	0	0	1	0	0	0	0	0	0	TRL2	Not applicable	AMF
62	Marín C., Aguilera P., Cornejo P., Godoy R., Oehl F., Palfner G., Boy J.	Arbuscular mycorrhizal assemblages along contrasting andean forests of Southern Chile	2016	10.4067/S0718-95162016005000065	algorithm	Lagos	Zone V	Independent culture	Both	Fungi	Native	Characterization of communities (CC)	0	0	0	0	0	0	0	0	1	0	0	0	0	0	0	0	0	0	0	0	0	0	1	0	0	0	0	0	0	TRL1	Not applicable	N/A
63	Castillo C.G., Oehl F., Sieverding E.	Arbuscular mycorrhizal fungal diversity in wheat agroecosystems in Southern Chile and effects of seed treatment with natural products	2016	10.4067/S0718-95162016005000069	algorithm	Araucanía	Zone IV	Independent culture	Both	Fungi	Native	Characterization of communities (CC)	0	0	0	0	0	0	0	0	1	0	0	0	0	0	0	0	0	0	0	0	0	0	1	0	0	0	0	0	0	TRL1	Not applicable	N/A
64	Carrillo R., Guerrero J., Rodríguez M., Meriño-Gergichevich C.	Colonization of blueberry (Vaccinium corymbosum) plantlets by ericoid mycorrhizae under nursery conditions [Colonización de plántulas de arándano (Vaccinium corymbosum) en condiciones de vivero por micorrizas ericoides]	2015	10.4067/S0718-16202015000300005	algorithm	Araucanía	Zone IV	Dependent culture	Native	Fungi	Commercial	Evaluation of growth promoting effect in plant (EEP)	0	0	0	0	0	0	0	0	1	0	0	0	0	0	0	0	0	0	0	0	1	0	0	0	0	0	0	0	0	TRL2	Single strain	N/A
65	Durán P., Acuña J.J., Gianfreda L., Azcón R., Funes-Collado V., Mora M.L.	Endophytic selenobacteria as new inocula for selenium biofortification	2015	10.1016/j.apsoil.2015.08.016	algorithm	Araucanía	Zone IV	Dependent culture	Native	Bacteria	Native	CM+EEP	0	0	0	1	0	0	0	1	0	1	0	0	0	1	0	0	0	0	0	0	0	0	0	0	0	0	0	0	0	TRL2	Single strain	Bacillus sp. E5
66	Mora-Ruiz M.R., Font-Verdera F., Díaz-Gil C., Urdiain M., Rodríguez-Valdecantos G., González B., Orfila A., Rosselló-Móra R.	Moderate halophilic bacteria colonizing the phylloplane of halophytes of the subfamily Salicornioideae (Amaranthaceae)	2015	10.1016/j.syapm.2015.05.004	algorithm	Metropolitana	Zone III	Both	Native	Bacteria	Native	CM+EEP	0	0	0	0	0	0	0	0	1	0	0	0	0	0	0	0	0	0	0	0	0	0	0	0	0	0	0	0	0	TRL1	Not applicable	Chromohalobacter canadensis
67	Molina-Montenegro M.A., Oses R., Torres-Díaz C., Atala C., Núñez M.A., Armas C.	Fungal endophytes associated with roots of nurse cushion species have positive effects on native and invasive beneficiary plants in an alpine ecosystem	2015	10.1016/j.ppees.2015.02.003	algorithm	Metropolitana	Zone III	Dependent culture	Native	Fungi	Native	CM+EEP	0	0	0	0	0	0	0	0	1	0	0	0	0	0	0	0	0	0	0	0	0	0	0	0	0	0	1	1	0	TRL2	Single strain	Geomyces pannorum
68	Hayward J., Horton T.R., Pauchard A., Nunez M.A.	A single ectomycorrhizal fungal species can enable a Pinus invasion	2015	10.1890/14-1100.1	algorithm	Aysén del Generál Carlos Ibáñez del Campo	Zone VI	Independent culture	Native	Fungi	Commercial	Characterization of communities (CC)	0	0	0	0	0	0	0	1	0	0	0	0	0	0	0	0	0	0	0	0	0	0	0	0	1	0	0	0	0	TRL1	Not applicable	Suillus luteus,Hebeloma mesophaeum,Tomentella cf sublilacina,Hydnaceae sp.
69	Baginsky C., Brito B., Scherson R., Pertuzé R., Seguel O., Cañete A., Araneda C., Johnson W.E.	Genetic diversity of Rhizobium from nodulating beans grown in a variety of Mediterranean climate soils of Chile	2015	10.1007/s00203-014-1067-y	algorithm	Maule	Zone III	Dependent culture	Both	Bacteria	Commercial	Characterization of communities (CC)	0	1	0	0	0	0	0	0	0	0	0	0	0	0	0	0	0	0	0	0	1	0	0	0	0	0	0	0	0	TRL1	Single strain	R. leguminosarum,R. etli,R. tropici,R. leucaenae
70	Medina J., Meier S., Rubio R., Curaqueo G., Borie F., Aguilera P., Oehl F., Cornejo P.	Arbuscular mycorrhizal status of pioneer plants from the mouth of lake Budi, Araucanía Region, Chile	2015	10.4067/S0718-95162015005000012	algorithm	Araucanía	Zone IV	Independent culture	Native	Bacteria+Fungi	Native	Characterization of communities (CC)	0	0	0	0	0	0	0	1	0	0	0	0	0	0	0	0	0	0	0	0	0	0	0	0	0	0	0	1	0	TRL1	Not applicable	0
71	Brutti L., Alvarado P., Rojas T., Martensson A.	Tomato seedling development is improved by a substrate inoculated with a combination of rhizobacteria and fungi	2015	10.1080/09064710.2014.977338	algorithm	Metropolitana	Zone III	Dependent culture	No native	Bacteria+Fungi	Commercial	Evaluation of growth promoting effect in plant (EEP)	0	0	0	0	0	0	0	1	0	0	0	0	0	0	0	0	0	0	0	0	0	0	0	0	0	0	0	0	0	TRL2	Consortia	Bacillus subtilis; Pseudomonas fluorescens; B. subtilis; P. fluorescens; Trichoderma harzianum,; yeast, algae and Nocardia
72	Lagos L.M., Navarrete O.U., Maruyama F., Crowley D.E., Cid F.P., Mora M.L., Jorquera M.A.	Bacterial community structures in rhizosphere microsites of ryegrass (Lolium perenne var. Nui) as revealed by pyrosequencing	2014	10.1007/s00374-014-0939-2	algorithm	Araucanía	Zone IV	Independent culture	Native	Bacteria	Native	Characterization of communities (CC)	0	0	0	0	0	0	0	0	1	0	0	0	0	0	0	0	0	0	0	0	0	0	0	0	0	0	1	1	0	TRL1	Not applicable	Taxas: Proteobacteria, Actinobacteria, and Acidobacteria.
73	Aguilera P., Cornejo P., Borie F., Barea J.M., von Baer E., Oehl F.	Diversity of arbuscular mycorrhizal fungi associated with Triticum aestivum L. plants growing in an Andosol with high aluminum level	2014	10.1016/j.agee.2014.01.029	algorithm	Araucanía	Zone IV	Dependent culture	Native	Fungi	Native	Characterization of communities (CC)	0	0	0	0	0	0	0	0	1	1	0	1	0	0	0	0	0	0	0	0	0	0	0	0	0	0	0	1	0	TRL1	Single strain	Acaulospora, Pacispora, Claroideoglomus, Glomus, Funneliformis, Septoglomus, Simiglomus, Scutellospora, Cetraspora, Ambispora, Archaeospora and Paraglomus.
74	Pereira G., Romero C., Suz L.M., Atala C.	Essential mycorrhizal partners of the endemic Chilean orchids Chloraea collicensis and C. gavilu	2014	10.1016/j.flora.2013.12.001	algorithm	Araucanía	Zone IV	Dependent culture	Native	Fungi	Native	Characterization of communities (CC)	0	0	0	0	0	0	0	0	1	0	0	0	0	0	0	0	0	0	0	0	0	0	0	1	0	0	0	1	0	TRL1	Single strain	Tulasnella calospora;Tulasnellaceae sp
75	Jorquera M.A., Inostroza N.G., Lagos L.M., Barra P.J., Marileo L.G., Rilling J.I., Campos D.C., Crowley D.E., Richardson A.E., Mora M.L.	Bacterial community structure and detection of putative plant growth-promoting rhizobacteria associated with plants grown in Chilean agro-ecosystems and undisturbed ecosystems	2014	10.1007/s00374-014-0935-6	algorithm	Araucanía	Zone IV	Dependent culture	Native	Bacteria	Native	CM+CC	0	0	0	0	1	0	0	0	0	0	0	0	0	0	0	0	0	0	0	0	1	0	0	0	0	0	0	0	0	TRL2	Consortia	Taxonomic groups: Proteobacteria, Gammaproteobacteria, Enterobacteriales
76	Durán P., Acuña J.J., Jorquera M.A., Azcón R., Paredes C., Rengel Z., de la Luz Mora M.	Endophytic bacteria from selenium-supplemented wheat plants could be useful for plant-growth promotion, biofortification and Gaeumannomyces graminis biocontrol in wheat production	2014	10.1007/s00374-014-0920-0	algorithm	Araucanía	Zone IV	Dependent culture	Native	Bacteria	Native	Characterization of mechanisms PGP (CM)	0	0	0	0	0	1	0	0	0	1	0	0	0	0	1	0	0	0	0	0	0	0	0	0	0	0	1	0	0	TRL2	Consortia	Klebsiella sp.E1-E4;Bacillus sp E5-E8;Acinetobacter sp.E6.2
77	Campos D.C., Acevedo F., Morales E., Aravena J., Amiard V., Jorquera M.A., Inostroza N.G., Rubilar M.	Microencapsulation by spray drying of nitrogen-fixing bacteria associated with lupin nodules	2014	10.1007/s11274-014-1662-8	algorithm	Araucanía	Zone IV	Dependent culture	Native	Bacteria	Native	EEP+FCC	0	1	0	0	0	0	0	0	0	0	0	0	0	0	0	0	0	0	0	0	0	0	0	0	0	0	1	0	0	TRL3	Single strain	Alphaproteobacteria, Betaproteobacteria, Gammaproteobacteria and Bacteroidetes
78	Thébault A., Clément J.-C., Ibanez S., Roy J., Geremia R.A., Pérez C.A., Buttler A., Estienne Y., Lavorel S.	Nitrogen limitation and microbial diversity at the treeline	2014	10.1111/j.1600-0706.2013.00860.x	algorithm	Magallanes y la Antártica Chilena	Zone VI	Independent culture	Native	Bacteria+Fungi	Native	Functional characterization of comunnities (FCC)	0	1	0	0	0	0	0	0	0	1	0	0	0	0	0	0	0	1	0	0	0	0	0	0	1	0	1	1	0	TRL1	Not applicable	N.A
79	Montero Sommerfeld H., Díaz L.M., Alvarez M., Añazco Villanueva C., Matus F., Boon N., Boeckx P., Huygens D.	High winter diversity of arbuscular mycorrhizal fungal communities in shallow and deep grassland soils	2013	10.1016/j.soilbio.2013.06.002	algorithm	Ríos	Zone V	Independent culture	Native	Fungi	Native	Characterization of communities (CC)	0	0	0	0	0	0	0	0	1	0	0	0	0	0	0	0	0	0	0	0	0	0	1	0	0	0	0	0	0	TRL1	Not applicable	N.A.
80	Castañón-Silva P.A., Venegas-Urrutia M.A., Lobos-Valenzuela M.G., Gaete-Olivares H.J.	Influence of arbuscular mycorrhizal glomus spp. on growth and accumulation of copper in sunflower helianthus annuus L. [Influencia de micorrizas arbusculares glomus SPP. en el crecimiento y acumulación de cobre engirasol helianthus annuus L.]	2013	http://www.scielo.org.mx/scielo.php?script=sci_arttext&pid=S1405-31952013000400001&lng=es&tlng=es	algorithm	Valparaíso	Zone III	Dependent culture	No native	Fungi	Native	CM+EEP	0	0	0	0	0	1	0	0	0	1	0	0	0	0	1	0	0	0	0	0	0	0	1	1	0	0	0	0	0	TRL1	Single strain	Glomus spp
81	Urrutia C., Rubilar O., Paredes C., Benítez E., Azcón R., Diez M.C.	Removal of pentachlorophenol in a rhizotron system with ryegrass (Lolium multiflorum)	2013	10.4067/S0718-95162013005000039	algorithm	Araucanía	Zone IV	Independent culture	Native	Bacteria	Native	Evaluation of growth promoting effect in plant (EEP)	0	0	0	0	0	1	0	0	0	0	0	0	0	0	0	0	0	0	0	0	0	0	1	0	0	0	0	0	0	TRL1	Not applicable	N.A.
82	Durán P., Acuña J.J., Jorquera M.A., Azcón R., Borie F., Cornejo P., Mora M.L.	Enhanced selenium content in wheat grain by co-inoculation of selenobacteria and arbuscular mycorrhizal fungi: A preliminary study as a potential Se biofortification strategy	2013	10.1016/j.jcs.2012.11.012	algorithm	Ríos	Zone V	Dependent culture	Native	Bacteria	Native	Evaluation of growth promoting effect in plant (EEP)	0	0	0	0	0	1	0	0	0	0	0	0	0	0	0	0	0	0	0	0	1	0	0	0	0	0	0	0	0	TRL1	Single strain	Stenotrophomonas sp. B19, Enterobacter sp.B16;Bacillus sp.R12;Pseudomonas sp.R8;Glomus claroideum
83	Healy R.A., Smith M.E., Bonito G.M., Pfister D.H., Ge Z.-W., Guevara G.G., Williams G., Stafford K., Kumar L., Lee T., Hobart C., Trappe J., Vilgalys R., McLaughlin D.J.	High diversity and widespread occurrence of mitotic spore mats in ectomycorrhizal Pezizales	2013	10.1111/mec.12135	algorithm	Araucanía	Zone IV	Both	Native	Fungi	Native	Functional characterization of comunnities (FCC)	0	0	0	0	0	1	0	0	0	0	0	0	0	0	0	0	0	0	0	0	1	0	0	0	0	0	0	0	0	TRL5	Not applicable
84	Acuña J.J., Jorquera M.A., Barra P.J., Crowley D.E., de la Luz Mora M.	Selenobacteria selected from the rhizosphere as a potential tool for Se biofortification of wheat crops	2013	10.1007/s00374-012-0705-2	algorithm	Ríos	Zone V	Both	Native	Bacteria	Native	EEP+FCC	0	0	0	0	1	0	0	1	0	0	0	0	0	0	0	0	0	0	0	0	0	0	0	0	0	0	0	0	1	TRL1	Consortia	Stenotrophomonas.B19;Bacillus.R12;Enterobacter.B16;Pseudomona.R8
85	Guiñazú L.B., Andrés J.A., Rovera M., Balzarini M., Rosas S.B.	Evaluation of rhizobacterial isolates from Argentina, Uruguay and Chile for plant growth-promoting characteristics and antagonistic activity towards Rhizoctonia sp. and Macrophomina sp. in vitro	2013	10.1016/j.ejsobi.2012.09.007	algorithm	Araucanía	Zone IV	Dependent culture	Native	Bacteria	Commercial	CM+EEP+FCC	0	0	0	0	0	1	0	0	0	0	0	0	0	0	0	0	0	0	0	0	0	0	1	0	0	0	0	0	0	TRL1	Consortia	Pseudomonas;Bacillus;Janibacter
86	Fernández-Martínez M.A., de los Ríos A., Sancho L.G., Pérez-Ortega S.	Diversity of Endosymbiotic Nostoc in Gunnera magellanica (L) from Tierra del Fuego, Chile	2013	10.1007/s00248-013-0223-2	algorithm	Magallanes y la Antártica Chilena	Zone VI	Independent culture	Native	Bacteria	Native	Characterization of communities (CC)	0	0	0	0	0	0	0	0	1	0	0	0	0	0	0	0	0	0	0	0	0	0	1	0	0	0	0	1	0	TRL1	Not applicable	Nostoc
87	Castillo C.G., Puccio F., Morales D., Borie F., Sieverding E.	Early arbuscular mycorrhiza colonization of wheat, barley and oats in Andosols of southern Chile	2012	10.4067/S0718-95162012005000012	algorithm	Araucanía	Zone IV	Independent culture	Native	Fungi	Native	Functional characterization of comunnities (FCC)	1	0	0	0	0	0	0	0	0	0	0	0	0	0	0	0	0	0	0	0	1	0	0	0	0	0	0	0	0	TRL1	Not applicable	AMF
88	Torres-Mellado G.A., Escobar I., Palfner G., Casanova-Katny M.A.	Mycotrophy in Gilliesieae, a threatened and poorly known tribe of Alliaceae from central Chile	2012	10.4067/S0716-078X2012000200004	algorithm	Metropolitana	Zone III	Independent culture	Native	Fungi	Native	Characterization of communities (CC)	0	0	0	0	0	0	0	0	1	0	0	0	0	0	0	0	0	0	0	0	0	0	1	1	0	0	0	1	0	TRL1	Not applicable	N.A.
89	Atala C., Muñoz-Capponi E., Pereira G., Navarrete E., Oses R., Molina-Montenegro M.	Impact of mycorrhizae and irrigation in the survival of seedlings of pinus radiata D. Don subject to drought [Impacto de la inoculación con micorrizas y el riego en la sobrevivencia de plántulas de pinus radiata D. Don sometidas a sequía]	2012	10.4067/S0717-66432012000200009	algorithm	Bío-Bío	Zone IV	Dependent culture	Native	Fungi	Commercial	Evaluation of growth promoting effect in plant (EEP)	0	0	0	0	0	0	0	0	1	1	0	0	0	1	0	0	0	0	0	0	0	0	0	0	1	0	0	0	0	TRL3	Single strain	Rhizopogon luteolus
90	Schalchli H., Hormazabal E., Becerra J., Birkett M., Alvear M., Vidal J., Quiroz A.	Antifungal activity of volatile metabolites emitted by mycelial cultures of saprophytic fungi	2011	10.1080/02757540.2011.596832	algorithm	Araucanía	Zone IV	Dependent culture	Native	Fungi	Native	Evaluation of growth promoting effect in plant (EEP)	0	0	0	0	0	0	0	0	1	0	0	0	0	0	0	0	0	0	0	0	0	0	0	0	1	0	0	1	0	TRL1	Consortia	Trichoderma viride;Schizophyllum commune;Trametes versicolor,
91	Morales A., Alvear M., Valenzuela E., Castillo C.E., Borie F.	Screening, evaluation and selection of phosphate-solubilising fungi as potential biofertiliser	2011	10.4067/S0718-95162011000400007	algorithm	Araucanía	Zone IV	Dependent culture	Native	Fungi	Native	CM+EEP	1	0	0	0	0	0	0	0	0	0	0	0	0	0	0	0	0	0	0	0	1	0	0	0	0	0	0	0	0	TRL2	Consortia	Penicillium albidum
92	Martínez O.A., Jorquera M.A., Crowley D.E., de la Mora M.L.	Influence of nitrogen fertilisation on pasture culturable rhizobacteria occurrence and the role of environmental factors on their potential PGPR activities	2011	10.1007/s00374-011-0593-x	algorithm	Araucanía	Zone IV	Dependent culture	Native	Bacteria	Commercial	Characterization of mechanisms PGP (CM)	1	1	0	0	0	0	0	0	0	0	0	0	0	0	0	0	0	0	0	0	0	0	1	0	0	0	0	0	0	TRL1	Consortia	Serratia sp.N0-10LB;Pseudomonas sop.N1-55PA
93	Casanova-Katny M.A., Torres-Mellado G.A., Palfner G., Cavieres L.A.	The best for the guest: High Andean nurse cushions of Azorella madreporica enhance arbuscular mycorrhizal status in associated plant species	2011	10.1007/s00572-011-0367-1	algorithm	Valparaíso	Zone III	Independent culture	Native	Fungi	Native	Characterization of communities (CC)	0	0	0	0	0	0	0	1	0	0	0	0	0	0	0	0	0	0	0	0	0	0	1	0	0	0	0	1	0	TRL1	Not applicable	N.A.
94	Aballay E., Mårtensson A., Persson P.	Screening of rhizosphere bacteria from grapevine for their suppressive effect on Xiphinema index Thorne & Allen on in vitro grape plants	2011	10.1007/s11104-011-0851-6	algorithm	Valparaíso	Zone III	Dependent culture	Native	Bacteria	Native	Characterization of communities (CC)	0	0	0	0	0	1	0	0	0	0	0	0	0	0	0	0	0	0	0	0	0	1	0	0	0	0	0	0	0	TRL1	Consortia	Pseudomonas putida;Escheichia coli;Pseudomonas fluorescens;Bacillus megaterium;B. brevis;Pseudomonas corrugata;P. savastanoi;Stenotrophomonas maltophilia;Serratia plymuthica
95	Jorquera M.A., Crowley D.E., Marschner P., Greiner R., Fernández M.T., Romero D., Menezes-Blackburn D., De La Luz Mora M.	Identification of β-propeller phytase-encoding genes in culturable Paenibacillus and Bacillus spp. from the rhizosphere of pasture plants on volcanic soils	2011	10.1111/j.1574-6941.2010.00995.x	algorithm	Ríos	Zone V	Dependent culture	Native	Bacteria	Native	CM+EEP+CC	1	0	0	0	0	0	0	0	0	0	0	0	0	0	0	0	0	0	0	0	0	0	1	0	0	0	0	0	0	TRL2	Single strain	Bacillus sp.MQH-15;Paenibacillus sp.SPT-03
96	Moraga-Suazo P., Opazo A., Zaldúa S., González G., Sanfuentes E.	Evaluation of Trichoderma spp. and Clonostachys spp. strains to control Fusarium circinatum in Pinus radiata seedlings	2011	10.4067/S0718-58392011000300011	algorithm	Bío-Bío	Zone IV	Dependent culture	Native	Fungi	Native	Functional characterization of comunnities (FCC)	0	0	0	0	0	1	0	0	0	0	0	0	0	0	0	0	0	0	0	0	0	0	0	0	1	0	0	0	0	TRL2	Consortia	Clonostachys.UDC-32;Clonostachys.UDC-222;Trichoderma.UDC-23;Trichoderma.UDC-408
97	Montealegre J., Valderrama L., Sánchez S., Herrera R., Besoain X., Pérez L.M.	Biological control of Rhizoctonia solani in tomatoes with Trichoderma harzianum mutants	2010	10.2225/vol13-issue2-fulltext-6	algorithm	Metropolitana	Zone III	Dependent culture	Native	Bacteria+Fungi	Commercial	CM+EEP	0	0	0	0	0	1	0	0	0	0	0	0	0	0	0	0	0	0	0	0	1	0	0	0	0	0	0	0	0	TRL2	Consortia	Th11A 80.1;Th12A10.1;Th650-NG7
98	Jorquera M.A., Hernández M., Martínez O., Marschner P., de la Luz Mora M.	Detection of aluminium tolerance plasmids and microbial diversity in the rhizosphere of plants grown in acidic volcanic soil	2010	10.1016/j.ejsobi.2010.03.005	algorithm	Araucanía	Zone IV	Both	Native	Bacteria+Fungi+Archeae	Both	CM+EEP+CC+FCC	0	0	0	0	0	0	0	0	1	1	0	0	0	0	1	0	0	0	0	0	0	0	1	0	0	0	0	0	0	TRL1	Not applicable	N.A.
99	Santelices, R; Palfner, G	CONTROLLED RHIZOGENESIS AND MYCORRHIZATION OF HAZELNUT (Corylus avellana L.) CUTTINGS WITH BLACK TRUFFLE (Tuber melanosporum Vitt.)	2010	10.4067/S0718-58392010000200003.	algorithm	Maule	Zone III	Dependent culture	No native	Fungi	Commercial	Characterization of mechanisms PGP (CM)	0	0	0	0	0	0	0	0	1	0	0	0	0	0	0	0	0	0	0	0	0	0	0	0	0	0	0	0	1	TRL2	Single strain	Tuber melanosporum Vitt.
100	Farías F., Orlando J., Bravo L., Guevara R., Carú M.	Comparison of soil bacterial communities associated with actinorhizal, non-actinorhizal plants and the interspaces in the sclerophyllous matorral from Central Chile in two different seasons	2009	10.1016/j.jaridenv.2009.06.010	algorithm	Metropolitana	Zone III	Independent culture	Native	Bacteria	Native	Characterization of communities (CC)	0	0	0	0	0	0	0	0	1	0	0	0	0	0	0	0	0	0	0	0	0	0	0	0	1	0	1	1	0	TRL1	Not applicable	N.A.
101	de Basanta D.W., Lado C., Estrada-Torres A., Stephenson S.L.	Description and life cycle of a new Didymium (Myxomycetes) from arid areas of Argentina and Chile	2009	10.3852/08-227	algorithm	Antofagasta	Zone I	Dependent culture	Native	Fungi	Native	Characterization of communities (CC)	0	0	0	0	0	0	0	0	1	0	0	0	0	0	0	0	0	0	0	0	0	0	0	0	0	0	1	1	0	TRL1	Not applicable	Didymium infundibuliforme,
102	Alvarez M., Huygens D., Olivares E., Saavedra I., Alberdi M., Valenzuela E.	Ectomycorrhizal fungi enhance nitrogen and phosphorus nutrition of Nothofagus dombeyi under drought conditions by regulating assimilative enzyme activities	2009	10.1111/j.1399-3054.2009.01237.x	algorithm	Lagos	Zone V	Dependent culture	Both	Fungi	Native	Evaluation of growth promoting effect in plant (EEP)	0	0	0	0	0	0	0	1	0	1	0	0	0	1	0	0	0	0	0	0	0	0	0	0	0	0	0	1	0	TRL2	Single strain	Descolea antartica Sing.; Pisolithus tinctorius (Pers.) Coker & Couch
103	Chávez M D., Pereira C G., Machuca H A.	Effect of inoculum type of three fungal species on the controlled mycorrhization of Pinus radiata seedlings [Efecto de tipos de inóculos de tres especies fúngicas en la micorrización controlada de plántulas de Pinus radiata]	2009	10.4067/S0717-92002009000100002	algorithm	Bío-Bío	Zone IV	Dependent culture	Native	Fungi	Commercial	EEP+CC	0	0	0	0	0	0	0	1	0	0	0	0	0	0	0	0	0	0	0	0	0	0	0	0	1	0	0	0	0	TRL1	Consortia	Rhizopogon luteolus;Suillus bellinii;Suillus luteus
104	Valarini P.J., Curaqueo G., Seguel A., Manzano K., Rubio R., Cornejo P., Borie F.	Effect of compost application on some properties of a volcanic soil from central South Chile [Efecto de la aplicación de compost sobre algunas propiedades de un suelo volcánico de la Región centro-sur de Chile]	2009	10.4067/S0718-58392009000300015	algorithm	Araucanía	Zone IV	Independent culture	Native	Fungi	Commercial	Functional characterization of comunnities (FCC)	0	0	0	0	0	0	0	0	1	0	0	0	0	0	0	0	0	0	0	0	1	0	1	0	0	0	0	0	0	TRL1	Not applicable	N.A.
105	Castillo R, Claudia; Sotomayor S, Leonardo; Ortiz O, Cesar; Leonelli C, Gina; Borie B, Fernando; Rubio H, Rosa	Effect of arbuscular mycorrhizal fungi on an ecological crop of chili peppers (Capsicum annuum L.) [Efecto de los hongos micorrícicos arbusculares en un cultivo ecológico de ají (Capsicum annuum L.) cacho de cabra]	2009	10.4067/S0718-58392009000100010	algorithm	Araucanía	Zone IV	Dependent culture	Both	Fungi	Commercial	Evaluation of growth promoting effect in plant (EEP)	0	0	0	0	0	0	0	0	1	0	0	0	0	0	0	0	0	0	0	0	1	0	0	0	0	0	0	0	0	TRL1	Single strain	Glomus claroideum; Glomus intraradices
106	Palfner G., Canseco M.I., Casanova-Katny A.	Post-fire seedlings of Nothofagus alpina in Southern Chile show strong dominance of a single ectomycorrhizal fungus and a vertical shift in root architecture	2008	10.1007/s11104-008-9697-y	algorithm	Araucanía	Zone IV	Independent culture	Native	Fungi	Native	Evaluation of growth promoting effect in plant (EEP)	0	0	0	0	0	0	0	0	1	1	0	0	0	0	0	0	0	0	1	0	0	0	0	0	1	0	0	1	0	TRL1	Not applicable	Descolea antarctica
107	Donoso E., Lobos G.A., Rojas N.	Effect of Trichoderma harzianum and compost in nursery Pinus radiata seedling [Efecto de Trichoderma harzianum y compost sobre el crecimiento de plántulas de Pinus radiata en vivero]	2008	10.4067/S0717-92002008000100006	algorithm	Maule	Zone III	Dependent culture	Native	Fungi	Commercial	CM+EEP	0	0	0	0	0	0	0	0	1	0	0	0	0	0	0	0	0	0	0	0	0	0	0	0	1	0	0	0	0	TRL1	Single strain	Trichoderma harzianum
108	Cornejo P., Rubio R., Castillo C., Azcón R., Borie F.	Mycorrhizal effectiveness on wheat nutrient acquisition in an acidic soil from southern Chile as affected by nitrogen sources	2008	10.1080/01904160802244670	algorithm	Araucanía	Zone IV	Dependent culture	Native	Fungi	Native	Evaluation of growth promoting effect in plant (EEP)	0	1	0	0	0	0	0	0	0	0	0	0	0	0	0	0	0	0	0	0	0	0	1	0	0	0	0	0	0	TRL2	Single strain	Glomus etunicatum.CH110
109	Jorquera M.A., Hernández M.T., Rengel Z., Marschner P., De La Luz Mora M.	Isolation of culturable phosphobacteria with both phytate-mineralization and phosphate-solubilization activity from the rhizosphere of plants grown in a volcanic soil	2008	10.1007/s00374-008-0288-0	algorithm	Araucanía	Zone IV	Dependent culture	Native	Bacteria	Native	CM+EEP	1	0	0	0	0	0	0	0	0	1	1	0	0	0	0	0	0	0	0	0	1	0	1	0	0	0	0	0	0	TRL2	Consortia	Pseudomonas;Enterobacter;Pantoea
110	Weber R.W.S., Becerra J., Silva M.J., Davoli P.	An unusual Xanthophyllomyces strain from leaves of Eucalyptus globulus in Chile	2008	10.1016/j.mycres.2007.11.019	algorithm	Bío-Bío	Zone IV	Dependent culture	Native	Fungi	Commercial	Characterization of communities (CC)	0	0	0	0	0	0	0	0	1	0	0	0	0	0	0	0	0	0	0	0	0	0	0	0	1	0	0	0	0	TRL1	Single strain	Xanthophyllomyces sp
111	Von Bennewitz E., Garrido E., Fredes C., Gutierrez L., Lošák T.	Soil mineral concentrations and soil microbial activity in grapevine inoculated with arbuscular mycorrhizal (AM) fungus in Chile	2008	10.11118/actaun200856050013	algorithm	Maule	Zone III	Independent culture	No native	Fungi	Commercial	Evaluation of growth promoting effect in plant (EEP)	0	0	0	0	0	0	0	0	1	0	0	0	0	0	0	0	0	0	0	0	0	1	0	0	0	0	0	0	0	TRL2	Not applicable	N.A.
112	Orlando J., Chávez M., Bravo L., Guevara R., Carú M.	Effect of Colletia hystrix (Clos), a pioneer actinorhizal plant from the Chilean matorral, on the genetic and potential metabolic diversity of the soil bacterial community	2007	10.1016/j.soilbio.2007.05.024	algorithm	Metropolitana	Zone III	Dependent culture	Native	Bacteria	Native	Characterization of communities (CC)	0	0	0	0	0	0	0	0	1	0	0	0	0	0	0	0	0	0	0	0	0	0	1	0	0	0	0	0	0	TRL1	Not applicable	N.A.
113	Morales A., Alvear M., Valenzuela E., Rubio R., Borie F.	Effect of inoculation with Penicillium albidum, a phosphate-solubilizing fungus, on the growth of Trifolium pratense cropped in a volcanic soil	2007	10.1002/jobm.200610255	algorithm	Araucanía	Zone IV	Dependent culture	Native	Bacteria	Native	CM+EEP	1	0	0	0	0	0	0	0	0	0	0	0	0	0	0	0	0	0	0	0	0	0	1	0	0	0	1	0	0	TRL1	Single strain	Penicillium albidum
114	Cornejo P., Borie F., Rubio R., Azcón R.	Influence of nitrogen source on the viability, functionality and persistence of Glomus etunicatum fungal propagules in an Andisol	2007	10.1016/j.apsoil.2006.06.006	algorithm	Araucanía	Zone IV	Dependent culture	Native	Fungi	Native	Functional characterization of comunnities (FCC)	0	1	0	0	0	0	0	0	0	0	0	0	0	0	0	0	0	0	0	0	0	0	1	0	0	0	1	0	0	TRL2	Single strain	G. etunicatum.CH 110
115	Alberdi M., Álvarez M., Valenzuela E., Godoy R., Olivares E., Barrientos M.	Response to water deficit of Nothofagus dombeyi plants inoculated with a specific {Descolea antárctica Sing) and non-specific (Pisolithus tinctorious (Pers.) Coker & Couch) ectomycorrhizal fungi	2007	10.4067/S0716-078X2007000400009	algorithm	Lagos	Zone V	Dependent culture	Native	Fungi	Native	EEP+FCC	0	0	0	0	0	0	0	1	0	1	0	0	0	1	0	0	0	0	0	0	0	0	0	0	1	0	0	1	0	TRL1	Single strain	Pisolithus tinctorious;Descolea antarctica
116	Machuca A., Pereira G., Aguiar A., Milagres A.M.F.	Metal-chelating compounds produced by ectomycorrhizal fungi collected from pine plantations	2007	10.1111/j.1472-765X.2006.02046.x	algorithm	Bío-Bío	Zone IV	Dependent culture	Native	Fungi	Native	Functional characterization of comunnities (FCC)	0	0	0	0	0	0	0	0	1	0	0	0	0	0	0	0	0	0	0	0	0	0	0	0	1	0	0	0	0	TRL1	Consortia	Scleroderma verrucosum;Suillus luteus;Rhizopogon luteolus
117	Mercader G.M., Flores S.Z., Vargas G.G., Von Stowasser E.S.	Screening to antagonistic fungi for Botrytis cinerea biocontrol in Chilean forest nurseries [Selección de hongos antagonistas para el control biológico de Botrytis cinerea en viveros forestales en Chile]	2006	10.4067/S0717-92002006000200007	algorithm	Bío-Bío	Zone IV	Dependent culture	Native	Fungi	Commercial	Evaluation of growth promoting effect in plant (EEP)	0	0	0	0	0	1	0	0	0	0	0	0	0	0	0	0	0	0	0	0	0	1	0	1	0	0	0	0	0	TRL1	Consortia	Trichoderma A6, A27, A30 ,A58; Clonostachys A10,A11,A14,A32
118	Castillo C.G., Borie F., Godoy R., Rubio R., Sieverding E.	Diversity of mycorrhizal plant species and arbuscular mycorrhizal fungi in evergreen forest, deciduous forest and grassland ecosystems of Southern Chile	2006	https://ojs.openagrar.de/index.php/JABFQ/article/view/2189	algorithm	Ríos	Zone V	Independent culture	Native	Fungi	Commercial	Characterization of communities (CC)	0	0	0	0	0	0	0	0	1	0	0	0	0	0	0	0	0	0	0	0	0	0	0	0	0	0	0	0	0	TRL1	Not applicable	N.A.
119	Campillo R., Urquiaga S., Undurraga P., Pino I., Boddey R.M.	Strategies to optimise biological nitrogen fixation in legume/grass pastures in the southern region of Chile	2005	10.1007/s11104-004-6717-4	algorithm	Lagos	Zone V	Independent culture	Native	Bacteria	Both	Evaluation of growth promoting effect in plant (EEP)	1	0	0	0	0	0	0	0	1	0	0	0	0	0	0	0	0	0	0	0	0	0	0	0	0	0	0	0	0	TRL1	Not applicable	N.A.
120	Montealegre J.R., Reyes R., Pérez L.M., Herrera R., Silva P., Besoain X.	Selection of bioantagonistic bacteria to be used in biological control of Rhizoctonia solani in tomato	2003	10.2225/vol6-issue2-fulltext-8	algorithm	Valparaíso	Zone III	Dependent culture	Native	Bacteria	Commercial	Evaluation of growth promoting effect in plant (EEP)	0	0	0	0	0	1	0	0	0	0	0	0	0	0	0	0	0	0	0	0	0	1	0	1	1	0	0	0	0	TRL1	Consortia	B. subtilis;B. lentimorbus
121	Rubio R., Borie F., Schalchli C., Castillo C., Azcón R.	Occurrence and effect of arbuscular mycorrhizal propagules in wheat as affected by the source and amount of phosphorus fertilizer and fungal inoculation	2003	10.1016/S0929-1393(03)00045-3	algorithm	Araucanía	Zone IV	Dependent culture	Native	Fungi	Native	Functional characterization of comunnities (FCC)	0	0	0	0	0	0	0	0	1	0	0	0	0	0	0	0	0	0	0	0	1	0	0	0	0	0	0	0	0	TRL1	Single strain	Glomus etunicatum
122	Guevara R., Armesto J.J., Caru M.	Genetic diversity of Nostoc microsymbionts from Gunnera tinctoria revealed by PCR-STRR fingerprinting	2002	10.1007/s00248-002-1019-y	algorithm	Lagos	Zone V	Independent culture	Native	Bacteria+Fungi	Native	Characterization of communities (CC)	0	0	0	0	0	0	0	0	1	0	0	0	0	0	0	0	0	0	0	0	0	0	0	0	0	0	0	0	0	TRL1	Not applicable	N.A.
123	Borie F., Redel Y., Rubio R., Rouanet J.L., Barea J.M.	Interactions between crop residues application and mycorrhizal developments and some soil-root interface properties and mineral acquisition by plants in an acidic soil	2002	10.1007/s00374-002-0508-y	algorithm	Araucanía	Zone IV	Dependent culture	Native	Fungi	Native	Functional characterization of comunnities (FCC)	1	0	0	0	0	0	0	0	0	0	0	0	0	0	0	0	0	0	0	0	1	0	0	0	0	0	0	0	0	TRL1	Single strain	Glomus etunicatum
124	Borie F., Rubio R.	Effects of arbuscular mycorrhizae and liming on growth and mineral acquisition of aluminum-tolerant and aluminum-sensitive barley cultivars	1999	10.1080/01904169909365612	algorithm	Araucanía	Zone IV	Dependent culture	Native	Fungi	Native	Functional characterization of comunnities (FCC)	1	0	0	0	0	0	0	0	0	0	0	0	0	0	0	0	0	0	0	0	1	0	0	0	0	0	0	0	0	TRL1	Single strain	Glomus etunicatum.CH10
125	Dhillion S.S., Vidiella P.E., Aquilera L.E., Friese C.F., De Leon E., Armesto J.J., Zak J.C.	Mycorrhizal plants and fungi in the fog-free Pacific coastal desert of Chile	1995	10.1007/BF00207410	algorithm	Atacama	Zone II	Independent culture	Native	Fungi	Native	Characterization of communities (CC)	0	0	0	0	0	0	0	0	1	0	0	0	0	0	0	0	0	0	0	0	0	0	0	0	0	0	0	0	0	TRL1	Not applicable	N.A.
126	Ciampi-Panno L., Fernandez C., Bustamante P., Andrade N., Ojeda S., Contreras A.	Biological control of bacterial wilt of potatoes caused by Pseudomonas solanacearum	1989	10.1007/BF02854019	algorithm	Metropolitana	Zone III	Independent culture	Native	Bacteria	Commercial	Evaluation of growth promoting effect in plant (EEP)	0	0	0	0	0	1	0	0	0	0	0	0	0	0	0	0	0	0	0	0	0	1	0	1	0	0	0	0	0	TRL3	Not applicable	BC8
127	Benedetti, Susana; Balocchi, Francisco; Hormazabal, Marco	Arbuscular mycorrhizal fungi (AMF) linked to Peumus boldus natural formation in Central Chile	2018	10.4067/S0718-58392018000300378	algorithm	Libertador General Bernardo O´Higgins	Zone III	Independent culture	Native	Fungi	Native	Characterization of communities (CC)	0	0	0	0	0	0	0	0	1	0	0	0	0	0	0	0	0	0	0	0	0	0	0	0	0	0	0	1	0	TRL1	Not applicable	Funneliformis badius;Funneliformis constrictus
128	Romero, C.; Cuba-Diaz, M.; Silva, R.	In vitro culture of Chloraea gavilu Lindl., an endemic terrestrial orchid from Chile	2018	10.1086/695488	algorithm	Araucanía	Zone IV	Dependent culture	Native	Fungi	Commercial	Functional characterization of comunnities (FCC)	0	0	0	0	0	0	0	0	1	0	0	0	0	0	0	0	0	0	0	0	0	0	0	0	0	0	0	0	0	TRL2	Not applicable	N.A.
129	Martinez, O. A.; Crowley, D. E.; Mora, M. L.; Jorquera, M. A.	Short-term study shows that phytate-mineralizing rhizobacteria inoculation affects the biomass, phosphorus (P) uptake and rhizosphere properties of cereal plants	2015	10.4067/S0718-95162015005000013	algorithm	Lagos	Zone V	Dependent culture	Native	Bacteria	Commercial	EEP+CC	1	0	0	1	0	0	0	0	0	1	0	1	0	0	0	0	0	0	0	0	0	0	1	0	0	0	0	0	0	TRL2	Single strain	Bacillus sp. N1-19NA; Enterobacter sp. N0- 29PA; Pseudomonas sp.N1-55PA; Serratia sp. N0-10LB
130	Novoa M, Daniela; Palma S, Soledad; Gaete O, Hernan	EFFECT OF ARBUSCULAR MYCORRHIZAL FUNGI Glomus spp. INOCULATION ON ALFALFA GROWTH IN SOILS WITH COPPER	2010	10.4067/S0718-58392010000200009.	algorithm	Valparaíso	Zone III	Dependent culture	No native	Fungi	Commercial	Evaluation of growth promoting effect in plant (EEP)	0	0	0	0	0	0	0	1		1	0	0	0	0	1	0	0	0	0	0	0	0	0	0	0	0	0	0	1	TRL2	Consortia	MYCOSYM TRI-TON® Glomus etunicatum; Glomus fasciculatum; Glomus intraradices
131	Cornejo, Pablo; Rubio, Rosa; Borie, Fernando	MYCORRHIZAL PROPAGULE PERSISTENCE IN A SUCCESSION OF CEREALS IN A DISTURBED AND UNDISTURBED ANDISOL FERTILIZED WITH TWO NITROGEN SOURCES	2009	10.4067/S0718-58392009000300016.	algorithm	Araucanía	Zone IV	Dependent culture	Native	Fungi	Commercial	CM+EEP	0	0	0	0	0	0	0	1		1	1	0	0	0	0	0	0	0	0	0	0	0	0	0	0	0	0	0	0	TRL1	Not applicable
132	Valenzuela, E; Moreno, G; Garnica, S; Ramirez, C	Mycosociology in native forests of Nothofagus and plantings of Pinus radiata of the X Region of Chile: Diversity and ecological role	1998	http://rchn.biologiachile.cl/pdfs/1998/2/Valenzuela_et_al_1998.pdf	algorithm	Ríos	Zone V	Dependent culture	Native	Fungi	Native	CC+CFC	0	0	0	0	0	0	0	0	1	0	0	0	0	0	0	0	0	0	0	0	0	0	0	0	0	0	0	0	0	TRL1	Not applicable
133	Muñoz PA, Arismendi MJ, Cárdenas SF, Cifuentes Bachmann DE, Venegas FA, Sepúlveda-Chavera GF.	Diversity of culturable bacteria isolated from ancestral crops of Arica and Parinacota Region, Atacama Desert	2020	10.1007/s10482-020-01482-7	algorithm	Arica y Parinacota	Zone I	Dependent culture	Native	Bacteria	Commercial	Characterization of mechanisms PGP (CM)	1	1	1	1	0	0	0	0	0	0	0	0	0	0	0	0	0	0	0	0	0	0	0	0	0	0	0	0	0	TRL2	Not applicable
134	Fuentes A, Herrera H, Charles TC, Arriagada C.	Fungal and Bacterial Microbiome Associated with the Rhizosphere of Native Plants from the Atacama Desert	2020	10.3390/microorganisms8020209	algorithm	Tarapacá	Zone I	Independent culture	Native	Bacteria+Fungi	Native	Characterization of communities (CC)	0	0	0	0	0	0	0	0	1	6	0	1	1	1	0	1	1	1	0	0	0	0	0	0	0	0	0	0	0	TRL1	Not applicable
135	Araya JP, González M, Cardinale M, Schnell S, Stoll A.	Microbiome Dynamics Associated With the Atacama Flowering Desert	2020	10.3389/fmicb.2019.03160	algorithm	Atacama	Zone II	Independent culture	Native	Bacteria+Fungi+Archeae	Native	Characterization of communities (CC)	0	0	0	0	0	0	0	0	1	2	0	0	0	1	0	1	0	0	0	0	0	0	0	0	0	0	0	0	0	TRL1	Not applicable
136	Santander C, Ruiz A, García S, Aroca R, Cumming J, Cornejo P.	Efficiency of two arbuscular mycorrhizal fungal inocula to improve saline stress tolerance in lettuce plants by changes of antioxidant defense mechanisms	2020	10.1002/jsfa.10166	algorithm	Araucanía	Zone IV	Dependent culture	Native	Fungi	Commercial	Evaluation of growth promoting effect in plant (EEP)	0	0	0	0	0	0	0	1	0	1	0	0	1	0	0	0	0	0	0	0	1	0	0	0	0	0	0	0	0	TRL1	Consortia	Claroideoglomus lamellosum (MN263071); Diversispora celata (MN264508); Funneliformis mosseae (MN264635); and single strain Claroideoglomus claroideum
137	Poblete-Morales M, Plaza N, Almasia R, Corsini G, Silva-Moreno E.	Draft Genome Sequence of Pseudomonas sp. Strain M7D1, Isolated from the Rhizosphere of Desert Bloom Plants	2019	10.1128/MRA.00441-19	algorithm	Atacama	Zone II	Independent culture	Native	Bacteria	Native	Characterization of mechanisms PGP (CM)	1	0	1	1	0	0	0	1	0	0	0	0	0	0	0	0	0	0	0	0	0	0	0	0	0	0	0	0	0	TRL1	Not applicable	Pseudomonas sp. M7D1
138	Inostroza NG, Barra PJ, Wick LY, Mora ML, Jorquera MA.	Effect of rhizobacterial consortia from undisturbed arid- and agro-ecosystems on wheat growth under different conditions	2017	10.1111/lam.12697	algorithm	Araucanía	Zone IV	Dependent culture	Native	Bacteria	Commercial	Evaluation of growth promoting effect in plant (EEP)	0	0	0	0	0	0	0	0	1	2	0	1	0	1	0	0	0	0	0	0	0	0	0	0	0	0	0	0	1	TRL1	Consortia	Bacillus sp. AD-54A, Serratia sp. AD-7 · 6, Bacillus sp. AC-225 and Bacillus sp. MQH-19, Enterobacter sp. B16, Enterobacter sp. N0-29PA
139	Marin, C; Godoy, R; Valenzuela, E; Schloter, M; Wubet, T; Boy, J; Gschwendtner, S	Functional land-use change effects on soil fungal communities in Chilean temperate rainforests	2017	10.4067/S0718-95162017000400011	algorithm	Lagos	Zone V	Independent culture	Native	Fungi	Native	CC+CFC	0	0	0	0	0	0	0	0	1	2	1	1	0	0	0	0	0	0	0	0	0	0	0	0	0	0	0	0	0	TRL1	Not applicable
140	Cornejo, P; Meier, S; Garcia, S; Ferrol, N; Duran, P; Borie, F; Seguel, A	Contribution of inoculation with arbuscular mycorrhizal fungi to the bioremediation of a copper contaminated soil using Oenothera picensis	2017	10.4067/S0718-95162016005000070	algorithm	Valparaíso	Zone III	Dependent culture	Native	Fungi	Native	Evaluation of growth promoting effect in plant (EEP)	0	0	0	0	0	0	0	0	1	1	0	0	0	0	1	0	0	0	0	0	0	0	0	0	0	1	0	1	0	TRL1	Single strain	Claroideoglomus claroideum
141	Chavez, D; Machuca, A; Torres-Mellado, GA; Gallardo-Escarate, C; Palfner, G	Phylogenetic and mycogeographical aspects of Lactarius and Rhizopogon associated with Pinus radiata in south-central Chile	2015	10.11646/phytotaxa.226.2.7	algorithm	Bío-Bío	Zone IV	Dependent culture	No native	Fungi	Commercial	Characterization of communities (CC)	0	0	0	0	0	0	0	0	1	0	0	0	0	0	0	0	0	0	0	0	0	0	0	0	0	0	0	0	0	TRL1	Not applicable	Lactarius quieticolor
142	Trierveiler-Pereira, L; Smith, ME; Trappe, JM; Nouhra, ER	Sequestrate fungi from Patagonian Nothofagus forests: Cystangium (Russulaceae, Basidiomycota)	2015	10.3852/13-302	algorithm	Ríos	Zone V	Dependent culture	Native	Fungi	Native	Characterization of communities (CC)	0	0	0	0	0	0	0	0	1	0	0	0	0	0	0	0	0	0	0	0	0	0	0	0	0	0	0	0	0	TRL1	Not applicable	Cystangium
143	Junier, P; Alfaro, M; Guevara, R; Witzel, KP; Caru, M	Genetic diversity of Rhizobium present in nodules of Phaseolus vulgaris L. cultivated in two soils of the central region in Chile	2014	10.1016/j.apsoil.2014.03.014	algorithm	Metropolitana	Zone III	Independent culture	Native	Bacteria	Commercial	Characterization of communities (CC)	0	1	0	0	0	0	0	0	0	0	0	0	0	0	0	0	0	0	0	0	0	0	0	0	0	0	0	0	0	TRL1	Not applicable
144	Palacios, YM; Palfner, G; Hernandez, CE	The ectomycorrhizal community in a chronosequence of Pinus radiata (Pinophyta: Pinaceae) of the transitional Mediterranean-temperate climatic zone of central Chile	2012	10.4067/S0716-078X2012000100005	algorithm	Bío-Bío	Zone IV	Dependent culture	Native	Fungi	Commercial	Characterization of communities (CC)	0	0	0	0	0	0	0	0	1	0	0	0	0	0	0	0	0	0	0	0	0	0	0	0	0	0	0	0	0	TRL1	Not applicable
145	Acuna, JJ; Jorquera, MA; Martinez, OA; Menezes-Blackburn, D; Fernandez, MT; Marschner, P; Greiner, R; Mora, ML	Indole acetic acid and phytase activity produced by rhizosphere bacilli as affected by pH and metals	2011	10.4067/S0718-95162011000300001	algorithm	Araucanía	Zone IV	Dependent culture	Native	Bacteria	Commercial	Characterization of mechanisms PGP (CM)	1	0	1	1	0	0	0	0	0	3	1	1	0	0	0	0	0	0	0	1	0	0	0	0	0	0	0	0	0	TRL2	Not applicable	Bacillus sp. MQH−19 and Paenibacillus sp. SPT−03
146	Alberdi, M; Alvarez, M; Valenzuela, E; Godoy, R; Olivaress, E; Barrtentosz, M	Response to water deficit of Nothofagus dombeyi plants inoculated with a specific (Descolea antarctica Sing) and non-specific (Pisolithus tinctorious (Pers.) Coker & Couch) ectomycorrhizal fungi	2007	10.4067/S0716-078X2007000400009.	algorithm	Ríos	Zone V	Dependent culture	Native	Fungi	Native	Evaluation of growth promoting effect in plant (EEP)	0	0	0	0	0	0	0	1	0	1	0	0	0	1	0	0	0	0	0	0	0	0	0	0	0	0	0	1	0	TRL1	Single strain	Descolea antarctica; Pisolithus tinctorious
147	Aguilera, LE; Gutierrez, JR; Moreno, RJ	Vesiculo arbuscular mycorrhizae associated with saltbushes Atriplex spp. (Chenopodiaceae) in the Chilean arid zone	1998	http://rchn.biologiachile.cl/pdfs/1998/3/Aguilera_et_al_1998.pdf	algorithm	Coquimbo	Zone II	Dependent culture	Native	Fungi	Native	Characterization of communities (CC)	0	0	0	0	0	0	0	0	1	0	0	0	0	0	0	0	0	0	0	0	0	0	0	0	0	0	0	0	0	TRL1	Not applicable
148	Fincheira, P., Venthur, H., Mutis, A., Parada, M., & Quiroz, A.	Growth promotion of Lactuca sativa in response to volatile organic compounds emitted from diverse bacterial species. Microbiological research	2016	10.1016/j.micres.2016.09.008	manually	Araucanía	Zone IV	Dependent culture	Native	Bacteria	Commercial	CM+EEP	0	0	0	0	0	0	0	1	0	0	0	0	0	0	0	0	0	0	0	0	1	0	0	0	0	0	0	0	0	TRL2	Single strain	Bacillus sp. BCT74-2; Bacillus sp. BCT11; Bacillus sp. BCT9; Bacillus sp. BCT74-1; Bacillus sp. BCT4; Bacillus sp. BCT53; Bacillus sp. BCT5; Pseudomonas sp. BCT42; Serratia sp. BCT34; Staphylococcus sp. BCT54
149	Salvatierra‐Martinez, R., Arancibia, W., Araya, M., Aguilera, S., Olalde, V., Bravo, J., & Stoll, A.	Colonization ability as an indicator of enhanced biocontrol capacity—An example using two Bacillus amyloliquefaciens strains and Botrytis cinerea infection of tomatoes	2018	10.1111/jph.12718	manually	Coquimbo	Zone II	Dependent culture	Native	Bacteria	Commercial	CM+EEP	1	1	1	1	0	1	0	1	0	0	0	0	0	0	0	0	0	0	0	0	1	0	0	0	0	0	0	0	0	TRL1	Single strain	B. amyloliquefaciens FZB42
150	Cisternas‐Jamet, J., Salvatierra‐Martínez, R., Vega‐Gálvez, A., Uribe, E., Goñi, M. G., & Stoll, A.	Root inoculation of green bell pepper (Capsicum annum) with Bacillus amyloliquefaciens BBC047: effect on biochemical composition and antioxidant capacity.	2019	10.1002/jsfa.9758	manually	Coquimbo	Zone II	Dependent culture	Native	Bacteria	Commercial	Evaluation of growth promoting effect in plant (EEP)	0	0	0	0	0	0	0	0	1	0	0	0	0	0	0	0	0	0	0	0	1	0	0	0	0	0	0	0	0	TRL3	Single strain	B. amyloliquefaciens FZB42
151	Sepúlveda-Caamaño, M., Gerding, M., Vargas, M., Moya-Elizondo, E., Oyarzúa, P., & Campos, J.	Lentil (Lens culinaris L.) growth promoting rhizobacteria and their effect on nodulation in coinoculation with rhizobia	2018	10.1080/03650340.2017.1342034	manually	Ñuble	Zone IV	Dependent culture	Native	Bacteria	Commercial	Evaluation of growth promoting effect in plant (EEP)	0	0	0	1	1	0	0	0	0	0	0	0	0	0	0	0	0	0	0	0	0	0	0	0	0	0	0	0	1	TRL2	Consortia	Pseudomonas marginali; P. rhodesiae; P. umsongensis; h P. kilonensis; P. jessenii; P. granadensi;
152	Mutumba, F. A., Zagal, E., Gerding, M., Castillo-Rosales, D., Paulino, L., & Schoebitz, M.	Plant growth promoting rhizobacteria for improved water stress tolerance in wheat genotypes	2018	10.4067/S0718-95162018005003003	manually	Ñuble	Zone IV	Dependent culture	Native	Bacteria	Commercial	Evaluation of growth promoting effect in plant (EEP)	0	0	0	0	0	0	0	0	1	1	0	0	0	1	0	0	0	0	0	0	0	0	1	0	0	0	0	0	0	TRL2	Consortia	Bacillus sp. AG-70; Pseudomonas sp. AG-54
153	Ledger, T., Rojas, S., Timmermann, T., Pinedo, I., Poupin, M. J., Garrido, T., ... & Donoso, R.	Volatile-mediated effects predominate in Paraburkholderia phytofirmans growth promotion and salt stress tolerance of Arabidopsis thaliana.	2016	10.3389/fmicb.2016.01838	manually	Metropolitana	Zone III	Dependent culture	No native	Bacteria	Commercial	CM+EEP	0	0	0	1	1	0	0	1	0	1	0	0	1	0	0	0	0	0	0	0	0	0	0	0	0	0	1	0	0	TRL2	Single strain	Paraburkholderia phytofirmans PsJN
154	Silambarasan, S., Logeswari, P., Cornejo, P., & Kannan, V. R.	Role of plant growth–promoting rhizobacterial consortium in improving the Vigna radiata growth and alleviation of aluminum and drought stresses.	2019	10.1007/s11356-019-05939-9	manually	Araucanía	Zone IV	Dependent culture	Native	Bacteria	Commercial	CM+EEP	1	0	1	1	1	0	1	0	0	2	0	0	0	1	0	0	0	0	0	1	1	0	0	0	0	0	0	0	0	TRL1	Consortia	Bacillus megaterium and Pantoea agglomerans
155	Mauricio Schoebitz; Maria Dolores López; Humberto Serri; Oscar Martínez; Erick Zagal	Combined application of microbial consortium and humic substances to improve the growth performance of blueberry seedlings	2016	10.4067/S0718-95162016005000074	manually	Ñuble	Zone IV	Dependent culture	No native	Bacteria+Fungi	Commercial	Evaluation of growth promoting effect in plant (EEP)	0	0	0	0	0	0	0	0	1	0	0	0	0	0	0	0	0	0	0	0	0	1	0	0	0	0	0	0	0	TRL4	Consortia	Oikos bac 174: Bacillus subtilis, Bacillus licheniformis, Bacillus megaterium, Bacillus polymyxa, Bacillus macerans, Pseudomonas fluorescens, Pseudomonas putida, Nocardiacorallina, Saccharomyces cerevisiae and Trichodermaviride
156	M. Schoebitz1* and G. Vidal2	Microbial consortium and pig slurry to improve chemical properties of degraded soil and nutrient plant uptake (Schoebitz and Vidal, 2016)	2016	10.4067/S0718-95162016005000018	manually	Ñuble	Zone IV	Dependent culture	No native	Bacteria	Commercial	Evaluation of growth promoting effect in plant (EEP)	1	1	0	0	0	0	0	0	0	0	0	0	0	0	0	0	0	0	0	0	0	0	0	1	0	0	0	0	0	TRL3	Consortia	Bacillus Subtilis; Bacillus licheniformis, bacillus polymyxa; Bacillus macerans; Pseudonomas Fluorescens; Pseudononas putida; Norcadia carollina; Saccharomyces cervisiae; Thichoder maviride
157	Schoebitz, Mauricio; Castillo, Dalma; Jorquera, Milko; Roldan, Antonio	Responses of Microbiological Soil Properties to Intercropping at Different Planting Densities in an Acidic Andisol	2020	10.3390/agronomy10060781	manually	Ñuble	Zone IV	Independent culture	No native	Bacteria	Commercial	Characterization of communities (CC)	0	0	0	0	1	0	0	1		0	0	0	0	0	0	0	0	0	0	0	0	0	0	0	0	0	0	0	0	TRL1	Not applicable
158	Delfim, Jorge; Schoebitz, Mauricio; Paulino, Leandro; Hirzel, Juan; Zagal, Erick	Phosphorus Availability in Wheat, in Volcanic Soils Inoculated with Phosphate-Solubilizing Bacillus thuringiensis	2018	10.3390/su10010144	manually	Ñuble	Zone IV	Dependent culture	Native	Bacteria	Commercial	Evaluation of growth promoting effect in plant (EEP)	0	0	0	0	0	0	0	0	1	0	0	0	0	0	0	0	0	0	0	0	1	0	1	0	0	0	0	0	0	TRL1	Single strain	Bacillus thuringiensis
159	Jonathan Cisternas-Jameta, Ricardo Salvatierra-Martínez, Antonio Vega-Gálvez, Alexandra Stoll,Elsa Uribe, María Gabriela Goñi.	Biochemical composition as a function of fruit maturity stage of bell pepper (Capsicum annum) inoculated with Bacillus amyloliquefaciens	2020	10.1016/j.scienta.2019.109107	manually	Coquimbo	Zone II	Dependent culture	Native	Bacteria	Commercial	Evaluation of growth promoting effect in plant (EEP)	0	0	0	0	0	0	0	1	0	0	0	0	0	0	0	0	0	0	0	0	1	0	0	0	0	0	0	0	0	TRL3	Single strain	B. amyloliquefaciens BBC047
160	Fincheira, Paola; Parra, Leonardo; Mutis, Ana ; Parada, Maribel; Quiroz, Andrés	Volatiles emitted by Bacillus sp BCT9 act as growth modulating agents on Lactuca sativa seedlings	2017	10.1016/j.micres.2017.06.007	manually	Araucanía	Zone IV	Dependent culture	Native	Bacteria	Commercial	Evaluation of growth promoting effect in plant (EEP)	0	0	0	0	0	0	0	1	0	0	0	0	0	0	0	0	0	0	0	0	1	0	0	0	0	0	0	0	0	TRL1	Single strain	Bacillus sp.
161	Fincheira, P; Martínez M; Ortega, R.; Parada M.Á.	Effect of grape pomace on soil enzymatic activities and nutrients availability in Vitis vinifera 'Thompson seedless' Orchard	2015	10.17660/ActaHortic.2015.1076.17	manually	Araucanía	Zone IV	Independent culture	Native	Bacteria+Fungi+Archeae	Commercial	Functional characterization of comunnities (FCC)	1	1	0	0	0	0	0	0		0	0	0	0	0	0	0	0	0	0	0	0	0	0	0	0	0	0	0	0	TRL1	Not applicable
162	Dinka Mandakovic, Rodrigo Pulgar, Jonathan Maldonado, Wladimir Mardones, Mauricio González, Francisco A. Cubillos, Verónica Cambiazo	Fungal Diversity Analysis of Grape Musts from Central Valley-Chile and Characterization of Potential New Starter Cultures	2020	10.3390/microorganisms8060956	manually	Ñuble	Zone IV	Both	Native	Fungi	Commercial	Characterization of communities (CC)	0	0	0	0	0	0	0	0	1	0	0	0	0	0	0	0	0	0	0	0	0	0	0	0	0	0	0	0	0	TRL1	Not applicable
163	Qian Zhang, Jacquelinne J. Acuña, Nitza G. Inostroza, Paola Duran, María L. Mora, Michael J. Sadowsky, Milko A. Jorquera.	Niche Differentiation in the Composition, Predicted Function, and Co-occurrence Networks in Bacterial Communities Associated With Antarctic Vascular Plants	2020	10.3389/fmicb.2020.01036	manually	Magallanes y la Antártica Chilena	Zone VI	Independent culture	Native	Bacteria+Fungi+Archeae	Native	Characterization of communities (CC)	0	0	0	0	0	0	0	0	1	0	0	0	0	0	0	0	0	0	0	0	0	0	0	0	0	0	0	0	0	TRL1	Not applicable
164	Barra-Bucarei, L., France Iglesias, A., Gerding González, M., Silva Aguayo, G., Carrasco-Fernández, J., Castro, J. F., & Ortiz Campos, J.	Antifungal Activity of Beauveria bassiana Endophyte against Botrytis cinerea in Two Solanaceae Crops	2019	10.3390/microorganisms8010065	manually	Bío-Bío	Zone IV	Dependent culture	Native	Bacteria	Commercial	CM+EEP	0	0	0	0	0	1	0	0	0	0	0	0	0	0	0	0	0	0	0	0	1	0	0	0	0	0	0	0	0	TRL1	Single strain	B. bassiana
165	Carrasco-Fernández, Jorge, Guerra, Matías, Castro, Jean Franco, Bustamante, Luis, Barra-Bucarei, Lorena, Ceballos, Ricardo, Fernández, Natalí, Edgington, Steve, & France, Andrés	Plant growth promoting rhizobacteria from Juan Fernández archipelago improve germination rate of endangered plant Solanum fernandezianum Phil.	2020	10.4067/S0718-58392020000100041	manually	Valparaíso	Zone III	Dependent culture	Native	Bacteria	Native	CM+EEP	0	0	0	1	0	0	0	0	0	0	0	0	0	0	0	0	0	0	0	0	0	0	0	0	0	0	1	1	0	TRL2	Single strain	Serratia proteamaculans; Raoutella terrigena; Pseudomonas laurylsulfatiphila
166	Beltrán, M. Francisca, Osorio, Valeria, Lemus, Gamalier, Millas, Paz, France, Andrés, Correa, Francisco, & Sagredo, Boris.	Bacterial community associated with canker disease from sweet cherry orchards of central valley of Chile presents high resistance to copper	2021	10.4067/S0718-58392021000300378	manually	Libertador General Bernardo O´Higgins	Zone III	Independent culture	Native	Bacteria	Native	Characterization of communities (CC)	0	0	0	0	0	0	0	0	1	0	0	0	0	0	0	0	0	0	0	0	0	0	0	0	0	0	0	0	0	TRL1	Not applicable
167	Barra-Bucarei, L., González, M. G., Iglesias, A. F., Aguayo, G. S., Peñalosa, M. G., & Vera, P. V.	Beauveria bassiana Multifunction as an Endophyte: Growth Promotion and Biologic Control of Trialeurodes vaporariorum, (Westwood) (Hemiptera: Aleyrodidae) in Tomato	2020	10.3390/insects11090591	manually	Maule	Zone III	Dependent culture	Native	Bacteria	Commercial	CM+EEP	1	0	1	0	0	1	0	0	0	1	0	0	0	0	0	0	0	0	0	1	1	0	0	0	0	0	0	0	0	TRL2	Single strain	Beauveria bassiana (x5)
168	Gazitúa, M. C., Morgante, V., Poupin, M. J., Ledger, T., Rodríguez-Valdecantos, G., Herrera, C., … González, B.	The microbial community from the early-plant colonizer (Baccharis linearis) is required for plant establishment on copper mine tailings	2021	10.1038/s41598-021-89769-1	manually	Coquimbo	Zone II	Independent culture	Native	Bacteria	Native	CC+CFC	0	0	0	0	0	0	0	0	1	0	0	0	0	0	0	0	0	0	0	0	0	0	0	0	0	0	0	0	0	TRL1	Not applicable
169	Acuña, J. J., Marileo, L. G., Araya, M. A., Rilling, J. I., Larama, G. A., Mora, M. L., … Jorquera, M. A.	In Situ Cultivation Approach to Increase the Culturable Bacterial Diversity in the Rhizobiome of Plants	2020	10.1007/s42729-020-00222-0	manually	Araucanía	Zone IV	Dependent culture	Native	Bacteria	Commercial	CM+EEP	1	1	1	0	0	0	0	0	0	0	0	0	0	0	0	0	0	0	0	0	1	0	0	0	0	0	0	0	0	TRL1	Not applicable	N.A.
170	Barra PJ, Viscardi S, Jorquera MA, Duran PA, Valentine AJ and Mora ML	Understanding the Strategies to Overcome Phosphorus‒Deficiency and Aluminum‒Toxicity by Ryegrass Endophytic and Rhizosphere Phosphobacteria	2018	10.3389/fmicb.2018.01155	manually	Araucanía	Zone IV	Dependent culture	Native	Bacteria	Native	Characterization of mechanisms PGP (CM)	0	0	0	0	0	0	0	0	1	1	0	1	0	0	0	0	0	0	0	0	0	0	1	0	0	0	0	0	0	TRL2	Single strain	Klebsiella sp.RC3;Stenotrophomonas sp.RC5;Klebsiella sp.RCJ4;Serratia sp.RCJ6;Enterobacter sp.RJAL6
171	Marileo, L. G., Jorquera, M. A., Hernández, M., Briceño, G., de La Luz Mora, M., Demanet, R., & Palma, G.	Changes in bacterial communities by post-emergent herbicides in an Andisol fertilized with urea as revealed by DGGE	2016	10.1016/j.apsoil.2016.02.003	manually	Araucanía	Zone IV	Independent culture	Native	Bacteria	Commercial	Functional characterization of comunnities (FCC)	0	0	0	0	0	0	0	0	1	0	0	0	0	0	0	0	0	0	0	0	0	0	0	0	0	0	0	0	0	TRL1	Not applicable	N.A.
172	Menezes-Blackburn, D, Inostroza, N.G, Gianfreda, L, Greiner, R, Mora, M.L, & Jorquera, M.A.	Phytase-producing Bacillus sp. inoculation increases the phosphorus availability in cattle manure	2016	10.4067/S0718-95162016005000016	manually	Ríos	Zone V	Dependent culture	Native	Bacteria	Commercial	Characterization of mechanisms PGP (CM)	0	0	0	0	0	0	0	0	1	0	0	0	0	0	0	0	0	0	0	0	0	0	0	0	0	0	0	0	1	TRL2	Single strain	Bacillus sp.MQH-19
173	Durán, P, Acuña, J.J, Armada, E, López-Castillo, O.M, Cornejo, P, Mora, M.L, & Azcón, R.	Inoculation with selenobacteria and arbuscular mycorrhizal fungi to enhance selenium content in lettuce plants and improve tolerance against drought stress	2016	10.4067/S0718-95162016005000017	manually	Araucanía	Zone IV	Dependent culture	Native	Bacteria+Fungi	Commercial	Evaluation of growth promoting effect in plant (EEP)	1	0	1	0	0	0	0	0	0	2	0	1	0	1	0	0	0	0	0	0	1	0	0	0	0	0	0	0	0	TRL1	Not applicable	N.A.
174	Barra, P. J., Inostroza, N. G., Acuña, J. J., Mora, M. L., Crowley, D. E., & Jorquera, M. A.	Formulation of bacterial consortia from avocado (Persea americana Mill.) and their effect on growth, biomass and superoxide dismutase activity of wheat seedlings under salt stress	2016	10.1016/j.apsoil.2016.02.014	manually	Valparaíso	Zone III	Dependent culture	Native	Bacteria	Commercial	CM+EEP	0	0	0	0	1	0	0	0	1	1	0	0	1	0	0	0	0	0	0	0	1	0	0	0	0	0	0	0	0	TRL3	Consortia	Enterobacter sp.12; Enterobacter sp. 126; Serratia sp. 73; Microbacterium sp.35; Pseudomonas sp 33; Serratia sp. 16; Enterobacter sp.172; Enterobacter sp. 206; Enterobacter sp.198; Enterobacter sp. 357; Serratia sp. 343; Achromabacter sp 249.
175	Jorquera, M. A., Martínez, O. A., Marileo, L. G., Acuña, J. J., Saggar, S., & Mora, M. L.	Effect of nitrogen and phosphorus fertilization on the composition of rhizobacterial communities of two Chilean Andisol pastures	2013	10.1007/s11274-013-1427-9	manually	Araucanía	Zone IV	Independent culture	Native	Bacteria	Native	Characterization of communities (CC)	1	1	0	0	0	0	0	0	0	0	0	0	0	0	0	0	0	0	0	0	0	0	0	0	0	0	0	0	0	TRL1	Not applicable	N.A.
176	Muñoz Torres, P., Cárdenas, S., Arismendi Macuer, M., Huanacuni, N., Huanca-Mamani, W., Cifuentes, D., & Sepúlveda Chavera, G. F.	The Endophytic Pseudomonas sp. S57 for Plant-Growth Promotion and the Biocontrol of Phytopathogenic Fungi and Nematodes	2021	10.3390/plants10081531	manually	Arica y Parinacota	Zone I	Dependent culture	Native	Bacteria	Native	Evaluation of growth promoting effect in plant (EEP)	0	0	0	0	0	1	0	0	0	0	0	0	0	0	0	0	0	0	0	0	1	0	0	0	0	0	0	0	0	TRL2	Single strain	Pseudomonas sp. S57
177	Salvatierra-Martínez, R, Chavera, G. S., Mamani, W. H., & Molina, M. R.	Native strains of Trichoderma from northern Chile: Adaptive tolerance in boric saline soils	2015	http://www.redalyc.org/articulo.oa?id=33935906005	manually	Arica y Parinacota	Zone I	Dependent culture	Both	Fungi	Commercial	Evaluation of growth promoting effect in plant (EEP)	0	0	0	0	0	1	0	0	0	0	0	0	0	0	0	0	0	0	0	0	1	0	0	0	0	0	0	0	0	TRL1	Single strain	Tricoderma
178	Araya, M. A., Valenzuela, T., Inostroza, N. G., Maruyama, F., Jorquera, M. A., & Acuña, J. J.	Isolation and Characterization of Cold-Tolerant Hyper-ACC-Degrading Bacteria from the Rhizosphere, Endosphere, and Phyllosphere of Antarctic Vascular Plants	2020	10.3390/microorganisms8111788	manually	Magallanes y la Antártica Chilena	Zone VI	Dependent culture	Native	Bacteria	Native	Characterization of mechanisms PGP (CM)	0	0	0	0	1	0	0	0	0	1	0	0	0	0	0	1	0	0	0	0	0	0	0	0	0	0	0	0	0	TRL2	Not applicable	Pseudomonas sp;Serriata marescens
179	Barra, P. J., Pontigo, S., Delgado, M., Parra–Almuna, L., Duran, P., Valentine, A. J., … Mora, M. de la L.	Phosphobacteria inoculation enhances the benefit of P–fertilization on Lolium perenne in soils contrasting in P–availabilit	2019	10.1016/j.soilbio.2019.06.012	manually	Araucanía	Zone IV	Dependent culture	Native	Bacteria	Native	Evaluation of growth promoting effect in plant (EEP)	1	0	0	0	0	0	0	0	0	1	0	1	0	0	0	0	0	0	0	0	0	0	1	0	0	0	0	0	0	TRL2	Consortia	N.A.
180	Cid, F. P., Maruyama, F., Murase, K., Graether, S. P., Larama, G., Bravo, L. A., & Jorquera, M. A.	Draft genome sequences of bacteria isolated from the Deschampsia antarctica phyllosphere	2018	10.1007/s00792-018-1015-x	manually	Magallanes y la Antártica Chilena	Zone VI	Dependent culture	Native	Bacteria	Native	Functional characterization of comunnities (FCC)	0	0	0	0	0	0	0	0	1	0	0	0	0	0	0	0	0	0	0	0	0	0	0	0	0	0	0	0	0	TRL2	Not applicable	N.A.
181	Cid, F. P., Inostroza, N. G., Graether, S. P., Bravo, L. A., & Jorquera, M. A.	Bacterial community structures and ice recrystallization inhibition activity of bacteria isolated from the phyllosphere of the Antarctic vascular plant Deschampsia antarctica	2016	10.1007/s00300-016-2036-5	manually	Magallanes y la Antártica Chilena	Zone VI	Dependent culture	Native	Bacteria	Native	Functional characterization of comunnities (FCC)	0	0	0	0	0	0	0	0	1	0	0	0	0	0	0	0	0	0	0	0	0	0	0	0	0	0	1	1	0	TRL2	Not applicable	N.A.
182	Muci, A. L., Jorquera, M. A., Ávila, Á. I., Rengel, Z., Crowley, D. E., & de la Luz Mora, M.	A combination of cellular automata and agent-based models for simulating the root surface colonization by bacteria	2012	10.1016/j.ecolmodel.2012.07.035	manually	Araucanía	Zone IV	Dependent culture	Native	Bacteria	Native	Characterization of communities (CC)	0	0	0	0	0	0	0	0	1	0	0	0	0	0	0	0	0	0	0	0	0	0	0	0	0	0	0	0	0	TRL2	Not applicable	N.A.
183	Langer, H., Nandasena, K. G., Howieson, J. G., Jorquera, M., & Borie, F.	Genetic diversity of Sinorhizobium meliloti associated with alfalfa in Chilean volcanic soils and their symbiotic effectiveness under acidic conditions	2007	10.1007/s11274-007-9471-y	manually	Araucanía	Zone IV	Dependent culture	Native	Bacteria	Native	Characterization of communities (CC)	0	0	0	0	0	0	0	0	1	0	0	0	0	0	0	0	0	0	0	0	1	0	0	0	0	0	0	0	0	TRL1	Single strain	Sinorhizobium meliloti
